# Supplementary material for: Broad-scale spatial distribution, microhabitat association and habitat partitioning of damselfishes (family Pomacentridae) on an Okinawan coral reef
Source: PeerJ. 2025 Feb 14;13:e18977. doi: 10.7717/peerj.18977 (PMC11831974; doi:10.7717/peerj.18977)
Supplement: Supplemental Information 8 [file peerj-13-18977-s008.xls]

## Sheet: Sheet1
Table S1. Thirty-one categories of substrate for the analyses.
Substrate group	31 categories
Acroporid corals	Staghorn Acropora
	Branching Acropora
	Bottlebrush Acropora
	Corymbose Acropora
	Tabular Acropora
Non-acroporid corals	Pocillopora
	Branching Isopora
	Branching Millepora
	Branching Porites
	Other branching corals
	Foliose corals
	Massive corals
	Other corals
Dead corals	Dead staghorn Acropora
	Dead branching Acropora
	Dead bottlebrush Acropora
	Dead corymbose Acropora
	Dead tabular Acropora
	Dead Pocillopora
	Dead branching Isopora
	Dead branching Millepora
	Dead branching Porites
	Dead other branching corals
	Dead foliose corals
	Dead massive corals
	Dead other corals
Other substrates	Soft coral
	Rock
	Coral rubble
	Sand
	Macroalgae
