# Supplementary material for: Broad-scale spatial distribution, microhabitat association and habitat partitioning of damselfishes (family Pomacentridae) on an Okinawan coral reef
Source: PeerJ. 2025 Feb 14;13:e18977. doi: 10.7717/peerj.18977 (PMC11831974; doi:10.7717/peerj.18977)
Supplement: Supplemental Information 9 [file peerj-13-18977-s009.xls]

## Sheet: Table S2
Table S2. Numerical values of broad-scale Pianka’s niche overlap index and microhabitat-scale index for 14 species that showing greater degree in habitat partitioning among the 26 species.
	Amblyglyphidodon curacao			Amblyglyphidodon leucogaster			Chromis chrysura			Chromis viridis			Chrysipitera cyanea			Chrysiptera parasema			Dascyllus aruanus			Dascyllus reticulatus			Neopomacentrus anabatoides			Pomacentrus amboinensis			Pomacentrus coelestis			Pomacentrus vaiuli			Pomacentrus sp.1			Pomacentrus sp.2
	Broad-scale	Microhabitat-scale		Broad-scale	Microhabitat-scale		Broad-scale	Microhabitat-scale		Broad-scale	Microhabitat-scale		Broad-scale	Microhabitat-scale		Broad-scale	Microhabitat-scale		Broad-scale	Microhabitat-scale		Broad-scale	Microhabitat-scale		Broad-scale	Microhabitat-scale		Broad-scale	Microhabitat-scale		Broad-scale	Microhabitat-scale		Broad-scale	Microhabitat-scale		Broad-scale	Microhabitat-scale		Broad-scale	Microhabitat-scale
Abudefduf vaigiensis	0	0.0576364		0.132857	0.0917958		0.0362137	0.974359		0	0		0	0.100692		0	0		0	0		0	0		0	0.111761		0	0.461784		0	0.991837		0.103605	0.989075		0	0		0.234261	0.895323
Amblyglyphidodon curacao	-	-		0.41312	0.657306		0.00968476	0.114847		0.456178	0.682926		0.0747589	0.0619043		0.287553	0.299911		0.44225	0.146527		0.0212523	0.0860417		0.00930992	0.691069		0.200129	0.378994		0.00312134	0.0597643		0.0356549	0.108332		0.149755	0.61651		0.0310044	0.139329
Amblyglyphidodon leucogaster	0.41312	0.657306		-	-		0.0424335	0.126508		0.576743	0.263437		0.00177646	0.128171		0.258012	0.575832		0.146806	0.17763		0.107098	0.147515		0.0832679	0.203902		0.162951	0.332827		0	0.0910465		0.204236	0.152882		0.0350238	0.257316		0.0394243	0.105473
Chromis atripes	0	0.0676189		0.133834	0.102164		0.0309748	0.978374		0	0.000972439		0	0.101929		0	0.00684009		0	0.0110542		0.000626993	0.00510447		0.0178335	0.114402		0.000900073	0.481102		0	0.991363		0.135615	0.990699		0	0		0.234149	0.895847
Chromis chrysura	0.00968476	0.114847		0.0424335	0.126508		-	-		0.00736367	0.00734539		0	0.110838		0	0.0591814		0.0553207	0.0418114		0.0657339	0.00277499		0	0.11125		0.127558	0.626273		0.0134556	0.966405		0.256005	0.983854		0.00727429	0		0.228254	0.881797
Chromis margaritifer	0.00197265	0.086673		0.0280063	0.149697		0.0575153	0.976501		0.00138879	0.0494284		0.0070619	0.130793		0.000161249	0.113897		0.00634555	0.132264		0.0164031	0.113418		0.0103378	0.114179		0.0128768	0.53185		0.0376269	0.986201		0.117082	0.995214		0.0063208	0.000539272		0.235778	0.901614
Chromis ovatiformis	0.00591017	0.0773376		0.154536	0.104098		0.133259	0.986893		0.000195958	0.00248413		0.00240786	0.104741		0	0.0160006		0.00924382	0.0141402		0.0182354	0		0.307761	0.112274		0.0411219	0.520243		0	0.989316		0.270263	0.9931		0.0190137	0		0.233665	0.896237
Chromis tarnatensis	0.219582	0.488065		0.315267	0.594406		0	0		0.417597	0.68307		0	0.205974		0.0545443	0.82682		0	0.206749		0	0.150524		0.00473512	0.372032		0.00091617	0.189278		0	0		0.08475	0.0864258		0	0.319438		0.123251	0.0381553
Chromis vanderbilti	0	0.0575969		0	0.0917329		0.00520406	0.973692		0.000646423	0		0	0.100623		0	0		0.00396073	0		0.00215591	0		0	0.111685		0.00350585	0.462002		0.0339628	0.991157		0.00690581	0.98953		0.000700182	0		0.2341	0.901337
Chromis viridis	0.456178	0.682926		0.576743	0.263437		0.00736367	0.00734539		-	-		0.0840779	0.243803		0.106228	0.517678		0.397395	0.237916		0.104741	0.26289		0.0404276	0.661645		0.204962	0.171194		0.0666964	0.00736989		0.105809	0.0552165		0.0683559	0.155973		0	0.100584
Chrysipitera cyanea	0.0747589	0.0619043		0.00177646	0.128171		0	0.110838		0.0840779	0.243803		-	-		0.0112223	0.307213		0.101684	0.131609		0	0.187808		0	0.0119287		0.117959	0.279279		0.348421	0.10441		0.14558	0.156473		0.667542	0.00211035		0.662566	0.399824
Chrysiptera parasema	0.287553	0.299911		0.258012	0.575832		0	0.0591814		0.106228	0.517678		0.0112223	0.307213		-	-		0.14205	0.329477		0.00178128	0.281509		0.00293663	0.119126		0.0625484	0.388453		2.8903e-05	0.0110325		0.0227363	0.111386		0.0179705	0.28848		0.0439021	0.0678092
Chrysiptera rex	0.0109534	0.0619908		0.0817501	0.110305		0.064961	0.977366		0.022746	0.0176928		0.185006	0.116849		0.00136218	0.0461251		0.0153035	0.020281		0.0517301	0.0177147		0.0114815	0.111693		0.0610823	0.478031		0.187458	0.991599		0.346226	0.993589		0.132947	0.00281055		0.24486	0.900072
Dascyllus aruanus	0.44225	0.146527		0.146806	0.17763		0.0553207	0.0418114		0.397395	0.237916		0.101684	0.131609		0.14205	0.329477		-	-		0.308511	0.938133		0.0344606	0.0548186		0.574414	0.236896		0.086243	0.0587983		0.0314768	0.069673		0.154262	0.0762214		0	0.0774229
Dascyllus reticulatus	0.0212523	0.0860417		0.107098	0.147515		0.0657339	0.00277499		0.104741	0.26289		0	0.187808		0.00178128	0.281509		0.308511	0.938133		-	-		0.132787	0.0107956		0.717523	0.0529698		0.409523	0.0601762		0.161441	0.0479939		0.00938109	0.000673821		0.0342856	0.075477
Neopomacentrus anabatoides	0.00930992	0.691069		0.0832679	0.203902		0	0.11125		0.0404276	0.661645		0	0.0119287		0.00293663	0.119126		0.0344606	0.0548186		0.132787	0.0107956		-	-		0.0818925	0.155635		0.0052692	0.110849		0.0706735	0.12923		0	0.00292376		0.0261813	0.172608
Pomacentrus alexanderae	0.485501	0.771752		0.483223	0.358181		0.00941813	0.103465		0.339499	0.916913		0.101936	0.226109		0.29901	0.482576		0.167102	0.196431		0.242866	0.205979		0.21812	0.738216		0.214943	0.319394		0.0644947	0.0701812		0.147355	0.123763		0.101731	0.357319		0.0331344	0.168256
Pomacentrus amboinensis	0.200129	0.378994		0.162951	0.332827		0.127558	0.626273		0.204962	0.171194		0.117959	0.279279		0.0625484	0.388453		0.574414	0.236896		0.717523	0.0529698		0.0818925	0.155635		-	-		0.377919	0.465821		0.142281	0.559299		0.226761	0.0478889		0.227624	0.520037
Pomacentrus coelestis	0.00312134	0.0597643		0	0.0910465		0.0134556	0.966405		0.0666964	0.00736989		0.348421	0.10441		2.8903e-05	0.0110325		0.086243	0.0587983		0.409523	0.0601762		0.0052692	0.110849		0.377919	0.465821		-	-		0.100659	0.985598		0.240663	0		0.232348	0.896087
Pomacentrus lepidogenys	0.0162189	0.205706		0.342933	0.491111		0.0406828	0.604476		0.0729669	0.316598		0.0110267	0.264424		0.00399223	0.758908		0.0163306	0.287626		0.0697383	0.189874		0.0548586	0.0863688		0.0506947	0.659893		0.0143885	0.554061		0.335055	0.647131		0.0185726	0.00109673		0.197754	0.542147
Pomacentrus moluccensis	0.185327	0.600915		0.282456	0.312149		0.00149575	0.119052		0.261151	0.756751		0.46686	0.312379		0.197128	0.537915		0.227551	0.407625		0.325226	0.406458		0.406711	0.388444		0.335966	0.570921		0.253843	0.0272937		0.239721	0.0943277		0.437076	0.0789587		0.00755872	0.121186
Pomacentrus philippinus	0.02892	0.0640628		0.214835	0.101848		0.170698	0.976597		0.0581248	0.00612724		0.00422641	0.10469		0.00320597	0.0158007		0.0172658	0.0452509		0.0410687	0.0387038		0.0389238	0.112458		0.0378952	0.47826		0.0124836	0.990468		0.357863	0.991029		0.0084437	0.00732044		0.235149	0.89635
Pomacentrus sp.1	0.149755	0.139329		0.0350238	0.105473		0.00727429	0.881797		0.0683559	0.100584		0.667542	0.399824		0.0179705	0.0678092		0.154262	0.0774229		0.00938109	0.075477		0	0.172608		0.226761	0.520037		0.240663	0.896087		0.123518	0.913843		-	0.101722		0.441617	-
Pomacentrus sp.2	0.61651	0.0310044		0.257316	0.0394243		0	0.228254		0.155973	0		0.00211035	0.662566		0.28848	0.0439021		0.0762214	0		0.000673821	0.0342856		0.00292376	0.0261813		0.0478889	0.227624		0	0.232348		0.00670172	0.277086		0.101722	-		-	0.441617
Pomacentrus vaiuli	0.0356549	0.108332		0.204236	0.152882		0.256005	0.983854		0.105809	0.0552165		0.14558	0.156473		0.0227363	0.111386		0.0314768	0.069673		0.161441	0.0479939		0.0706735	0.12923		0.142281	0.559299		0.100659	0.985598		-	-		0.123518	0.00670172		0.277086	0.913843
Pomachromis richardsoni	0.0216271	0.0836677		0.176853	0.150903		0.0179292	0.979798		0.0658924	0.0405536		0.0654755	0.127297		0.000486631	0.100461		0.0244898	0.0338643		0.0608544	0.0164752		0.0669751	0.112947		0.0867119	0.526372		0.0649087	0.984508		0.303478	0.996393		0.0506758	4.22822e-05		0.253824	0.891393
