# Supplementary material for: Broad-scale spatial distribution, microhabitat association and habitat partitioning of damselfishes (family Pomacentridae) on an Okinawan coral reef
Source: PeerJ. 2025 Feb 14;13:e18977. doi: 10.7717/peerj.18977 (PMC11831974; doi:10.7717/peerj.18977)
Supplement: Supplemental Information 10 — Orange cells represent greater overlaps for both broad-scale and microhabitat-scale. [file peerj-13-18977-s010.xls]

## Sheet: Table S3 
Table S3. Numerical values of broad-scale Pianka’s niche overlap index and microhabitat-scale index for 12 species that showing greater degree in habitat overlaps among some species. Orange cells represent greater overlaps for both broad-scale and microhabitat-scale .
	Abudefduf vaigiensis			Chromis atripes			Chromis ovatiformis			Chromis margaritifer			Chromis vanderbilti			Chrysiptera rex			Chromis tarnatensis			Pomacentrus alexanderae			Pomacentrus moluccensis			Pomacentrus lepidogenys			Pomacentrus philippinus			Pomachromis richardsoni
	Broad-scale	Microhabitat-scale		Broad-scale	Microhabitat-scale		Broad-scale	Microhabitat-scale		Broad-scale	Microhabitat-scale		Broad-scale	Microhabitat-scale		Broad-scale	Microhabitat-scale		Broad-scale	Microhabitat-scale		Broad-scale	Microhabitat-scale		Broad-scale	Microhabitat-scale		Broad-scale	Microhabitat-scale		Broad-scale	Microhabitat-scale		Broad-scale	Microhabitat-scale
Abudefduf vaigiensis	-	-		0.977514	0.999522		0.663571	0.997459		0.15033	0.985314		0.000899642	0.999315		0.158743	0.998357		0	0		0	0.0653448		0	0.00246099		0.115242	0.549994		0.529042	0.998258		0.04463	0.992611
Amblyglyphidodon curacao	0	0.0576364		0	0.0676189		0.00591017	0.0773376		0.00197265	0.086673		0	0.0575969		0.0109534	0.0619908		0.219582	0.488065		0.485501	0.771752		0.185327	0.600915		0.0162189	0.205706		0.02892	0.0640628		0.0216271	0.0836677
Amblyglyphidodon leucogaster	0.132857	0.0917958		0.133834	0.102164		0.154536	0.104098		0.0280063	0.149697		0	0.0917329		0.0817501	0.110305		0.315267	0.594406		0.483223	0.358181		0.282456	0.312149		0.342933	0.491111		0.214835	0.101848		0.176853	0.150903
Chromis atripes	0.977514	0.999522		-	-		0.761157	0.998498		0.149113	0.98677		0	0.998838		0.171654	0.998099		0.0291315	0.00167832		0.0023935	0.0741909		0.00476485	0.0154916		0.142287	0.55795		0.576518	0.998614		0.0393357	0.993722
Chromis chrysura	0.0362137	0.974359		0.0309748	0.978374		0.133259	0.986893		0.0575153	0.976501		0.00520406	0.973692		0.064961	0.977366		0	0		0.00941813	0.103465		0.00149575	0.119052		0.0406828	0.604476		0.170698	0.976597		0.0179292	0.979798
Chromis margaritifer	0.15033	0.985314		0.149113	0.98677		0.14729	0.987696		-	-		0.597975	0.986143		0.674236	0.991053		0.00874207	0.0850149		0.00798974	0.106559		0.0137943	0.086557		0.131409	0.649501		0.394963	0.989801		0.352969	0.991731
Chromis ovatiformis	0.663571	0.997459		0.761157	0.998498		-	-		0.14729	0.987696		0	0.996775		0.17155	0.996553		0.096525	0		0.0435565	0.077908		0.0843622	0.0419058		0.243103	0.571647		0.547299	0.996998		0.0663376	0.994363
Chromis tarnatensis	0	0		0.0291315	0.00167832		0.096525	0		0.00874207	0.0850149		0	0		0.00267501	0.0370391		-	-		0.547485	0.578217		0.0200033	0.411588		0.036976	0.673441		0.0336716	0.0110388		0.00618106	0.0924535
Chromis vanderbilti	0.000899642	0.999315		0	0.998838		0	0.996775		0.597975	0.986143		-	-		0.664803	0.997863		0	0		0	0.0657286		0	0.00255039		0.00695538	0.552771		0.0844618	0.997869		0.335649	0.991931
Chromis viridis	0	0		0	0.000972439		0.000195958	0.00248413		0.00138879	0.0494284		0.000646423	0		0.022746	0.0176928		0.417597	0.68307		0.339499	0.916913		0.261151	0.756751		0.0729669	0.316598		0.0581248	0.00612724		0.0658924	0.0405536
Chrysipitera cyanea	0	0.100692		0	0.101929		0.00240786	0.104741		0.0070619	0.130793		0	0.100623		0.185006	0.116849		0	0.205974		0.101936	0.226109		0.46686	0.312379		0.0110267	0.264424		0.00422641	0.10469		0.0654755	0.127297
Chrysiptera parasema	0	0		0	0.00684009		0	0.0160006		0.000161249	0.113897		0	0		0.00136218	0.0461251		0.0545443	0.82682		0.29901	0.482576		0.197128	0.537915		0.00399223	0.758908		0.00320597	0.0158007		0.000486631	0.100461
Chrysiptera rex	0.158743	0.998357		0.171654	0.998099		0.17155	0.996553		0.674236	0.991053		0.664803	0.997863		-	-		0.00267501	0.0370391		0.0587741	0.079097		0.15079	0.0217325		0.312487	0.586695		0.471415	0.997499		0.493319	0.995976
Dascyllus aruanus	0	0		0	0.0110542		0.00924382	0.0141402		0.00634555	0.132264		0.00396073	0		0.0153035	0.020281		0	0.206749		0.167102	0.196431		0.227551	0.407625		0.0163306	0.287626		0.0172658	0.0452509		0.0244898	0.0338643
Dascyllus reticulatus	0	0		0.000626993	0.00510447		0.0182354	0		0.0164031	0.113418		0.00215591	0		0.0517301	0.0177147		0	0.150524		0.242866	0.205979		0.325226	0.406458		0.0697383	0.189874		0.0410687	0.0387038		0.0608544	0.0164752
Neopomacentrus anabatoides	0	0.111761		0.0178335	0.114402		0.307761	0.112274		0.0103378	0.114179		0	0.111685		0.0114815	0.111693		0.00473512	0.372032		0.21812	0.738216		0.406711	0.388444		0.0548586	0.0863688		0.0389238	0.112458		0.0669751	0.112947
Pomacentrus alexanderae	0	0.0653448		0.0023935	0.0741909		0.0435565	0.077908		0.00798974	0.106559		0	0.0657286		0.0587741	0.079097		0.547485	0.578217		-	-		0.532281	0.799452		0.0578231	0.314668		0.0432443	0.0730562		0.0737799	0.101836
Pomacentrus amboinensis	0	0.461784		0.000900073	0.481102		0.0411219	0.520243		0.0128768	0.53185		0.00350585	0.462002		0.0610823	0.478031		0.00091617	0.189278		0.214943	0.319394		0.335966	0.570921		0.0506947	0.659893		0.0378952	0.47826		0.0867119	0.526372
Pomacentrus coelestis	0	0.991837		0	0.991363		0	0.989316		0.0376269	0.986201		0.0339628	0.991157		0.187458	0.991599		0	0		0.0644947	0.0701812		0.253843	0.0272937		0.0143885	0.554061		0.0124836	0.990468		0.0649087	0.984508
Pomacentrus lepidogenys	0.115242	0.549994		0.142287	0.55795		0.243103	0.571647		0.131409	0.649501		0.00695538	0.552771		0.312487	0.586695		0.036976	0.673441		0.0578231	0.314668		0.106612	0.394134		-	-		0.585055	0.566254		0.647969	0.642459
Pomacentrus moluccensis	0	0.00246099		0.00476485	0.0154916		0.0843622	0.0419058		0.0137943	0.086557		0	0.00255039		0.15079	0.0217325		0.0200033	0.411588		0.532281	0.799452		-	-		0.106612	0.394134		0.0509068	0.0167409		0.141923	0.0596071
Pomacentrus philippinus	0.529042	0.998258		0.576518	0.998614		0.547299	0.996998		0.394963	0.989801		0.0844618	0.997869		0.471415	0.997499		0.0336716	0.0110388		0.0432443	0.0730562		0.0509068	0.0167409		0.585055	0.566254		-	-		0.462742	0.993218
Pomacentrus sp.1	0	0.895323		0	0.895847		0.0190137	0.896237		0.0063208	0.901614		0.000700182	0.901337		0.132947	0.900072		0	0.0381553		0.101731	0.168256		0.437076	0.121186		0.0185726	0.542147		0.0084437	0.89635		0.0506758	0.891393
Pomacentrus sp.2	0	0.234261		0	0.234149		0	0.233665		0.000539272	0.235778		0	0.2341		0.00281055	0.24486		0.319438	0.123251		0.357319	0.0331344		0.0789587	0.00755872		0.00109673	0.197754		0.00732044	0.235149		4.22822e-05	0.253824
Pomacentrus vaiuli	0.103605	0.989075		0.135615	0.990699		0.270263	0.9931		0.117082	0.995214		0.00690581	0.98953		0.346226	0.993589		0.08475	0.0864258		0.147355	0.123763		0.239721	0.0943277		0.335055	0.647131		0.357863	0.991029		0.303478	0.996393
Pomachromis richardsoni	0.04463	0.992611		0.0393357	0.993722		0.0663376	0.994363		0.352969	0.991731		0.335649	0.991931		0.493319	0.995976		0.00618106	0.0924535		0.0737799	0.101836		0.141923	0.0596071		0.647969	0.642459		0.462742	0.993218		-	-
