# Supplementary material for: Broad-scale spatial distribution, microhabitat association and habitat partitioning of damselfishes (family Pomacentridae) on an Okinawan coral reef
Source: PeerJ. 2025 Feb 14;13:e18977. doi: 10.7717/peerj.18977 (PMC11831974; doi:10.7717/peerj.18977)
Supplement: Supplemental Information 11 [file peerj-13-18977-s011.xls]

## Sheet: Sheet1
Site	(A) Ab. vaigiensis	(B) C. atripes	(C) C. vanderbilti	(D) C. margaritifer	(E) C. ovatiformis	(F) C. rex	(G) P. lepidogenys	(H) P. phillippinus	(I) P. vaiuli	(J) P. richardsoni
KP1	0	0	0	0	0	3.00752	54.1353	15.7895	7.5188	87.9699
KP11	0	0	0	4.31034	0	6.89655	140.517	57.7586	0	125.862
KP13	0	0	0	0	0	13.5593	226.271	48.3051	1.69492	461.864
KP14	0	0	0	1.48148	0	27.4074	7.40741	0.740741	9.62963	91.8519
KP15	0	0	0	0	0	0	0	0	0	0
KP16	0	0	0	0	0	0	0	1.2987	0	0
KP17	0	0	0	0	0	0.543478	0	0	0	10.8696
KP18	0	0	0	0	0	0	0	0.662252	0	0
KP20	0	0	0	0	0	0	0	0	0	0
KP21	0	0	0	0	0	0	0.540541	1.08108	0	1.08108
KP22	0	0	0	0	0	0	0	0	0	0
KP26	0	0	177.564	41.0256	0	17.3077	0	5.76923	0	369.231
KP27	0	0	15.8621	11.7241	0	28.2759	3.44828	28.2759	2.75862	152.414
KP28	0	0.543478	0	3.80435	1.08696	1.08696	5.43478	3.80435	17.9348	1.08696
KP29	0	0	0	0	0	0.588235	0	0	3.52941	32.3529
KP30	0	0	0	0	0	0.595238	0	0	0	3.57143
KP31	0	0	0	0	1.96078	0	0	3.26797	0	0
KP32	0	0	5.88235	5.88235	0	2.35294	18.2353	0.588235	0	40
KP33	0	0	0	0	0	0	0	1.1976	0	0
KP34	0	0	0	0	0	0	8.13953	0	0	11.6279
KP35	0	0	0	1.67598	0	0	3.35196	4.46927	0.558659	6.14525
KP36	0	0	0	0	0.632911	0.632911	12.0253	0.632911	0	0
KP37	0	0	0	0	0	2.99401	2.39521	1.1976	0	10.7784
KP38	0	0	0	2.05128	0	19.4872	57.9487	16.9231	6.15385	35.8974
KP39	0	0	5.55556	14.1975	0	14.1975	3.7037	14.8148	2.46914	14.8148
KP40	12.1951	0	0	33.5366	0	7.31707	9.14634	35.3659	3.04878	113.415
KP41	0	0	15.942	8.69565	0	26.8116	0	6.52174	0	214.493
KP42	0	0	0	0	0	0.675676	4.05405	1.35135	0	0
KP43	0	0	0	0	0	0	0	0.584795	0	0
KP44	0	0	0	0	0	0	0.649351	0	0	0
KP45	0	0	0	0	0	0	5.88235	0	3.36134	0.840336
KP5	0	0	0	0	0	0	0.540541	0	0.540541	0
KP50	0	0	0	0	0	0	0	0	0	0
KP51	0	0	0	1.37931	0	0	0	0	0	0
KP52	0	0	0	0	0	3.20513	15.3846	6.41026	10.2564	0
KP53	0	0	0	0	0	0	0	0	0	0
KP54	0	0	0	0	0	0	0	0	0	0
KP55	0	0	0	0	0	20.2532	46.2025	0.632911	30.3797	3.16456
KP56	0	0	0	0	0	1.86335	2.48447	34.1615	7.45342	0
KP57	0	0	0	13.8554	0	6.0241	5.42169	34.3373	5.42169	13.253
KP58	0	0	40.678	106.78	0	28.8136	0	18.6441	0.847458	116.949
KP59	0	0	166.393	48.3607	0	68.8525	0	9.83607	0	76.2295
KP60	99.0099	127.723	0	20.7921	16.8317	15.8416	58.4158	98.0198	3.9604	34.6535
KP61	8	8	0	9.33333	0	11.3333	18	46	12	0
KP63	1.1976	0	19.7605	52.6946	0	0	4.19162	8.98204	0	56.8862
KP64	0	0	82.5806	56.129	0	25.1613	1.93548	0	0	49.0323
KP65	0	0	20.6452	69.0323	0	23.2258	25.8065	8.3871	0	101.29
KP67	0	0	0	6.36364	0	3.63636	1.36364	1.36364	0.454545	25.9091
KP68	0	0	0	7.01754	0	8.77193	43.8596	20.1754	13.1579	640.351
KP69	0	0	0	0	0	0	0	0	0	0
KP7	0	0	0	5.12821	1.7094	7.69231	363.248	41.0256	5.12821	334.188
KP70	0	0	0	0	0	1.44928	0.724638	4.34783	0.724638	0
KP73	0	0	0	0	0	0.42735	8.11966	0	2.13675	0.42735
KP9	0	0	0	11.6667	0	21.6667	205	38.3333	4.16667	370.833
P1	0	11.4504	0	32.8244	1.52672	15.2672	37.4046	98.4733	2.29008	61.8321
P10	0	0	0	0	0	5.44218	31.2925	2.72109	6.80272	86.3946
P11	0	2.47934	0	1.65289	8.26446	0.826446	28.9256	8.26446	3.30579	28.9256
P12	0	0	0	0	0	0	24.5033	9.93377	3.31126	0
P13	0	0	0	0	0	0	0	0	0	0
P2	0	12.7389	0	12.7389	12.7389	12.1019	54.1401	46.4968	2.54777	19.1083
P3	0	14.1243	0	5.64972	9.03955	0.564972	62.7119	16.9492	14.6893	9.60452
P4	0	0.60423	0	0	4.83384	0.60423	5.43807	6.64653	10.8761	0
P5	0	0	0	0	0	0	0	1.44928	0	0
P6	0	0	0	0	0	0	0	0	0	0
P7	0	0	0	0	0	0	0	0	0	0
P8	0	0	0	0.694444	0	1.38889	4.86111	0	1.38889	130.556
P9	0	0	0	3.4965	0	5.59441	55.2448	13.2867	9.79021	1.3986
