# Supplementary material for: Broad-scale spatial distribution, microhabitat association and habitat partitioning of damselfishes (family Pomacentridae) on an Okinawan coral reef
Source: PeerJ. 2025 Feb 14;13:e18977. doi: 10.7717/peerj.18977 (PMC11831974; doi:10.7717/peerj.18977)
Supplement: Supplemental Information 12 [file peerj-13-18977-s012.xls]

## Sheet: Sheet1
Site	(A) Am. Leucogaster	(B) C. shrysura	(C) C. viridis	(D) C. cyanea	(E) N. anabatoides	(F) P. coelestics	(G) P. moluccensis	(H) P. sp.1
KP1	19.5489	0	263.158	0	0	0	8.27068	0
KP11	0	0	0	0	0	0	0	0
KP13	0.847458	0	0	0	0	0	0	0
KP14	0	0	1.48148	15.5556	0	21.4815	38.5185	9.62963
KP15	0	0	10.6509	2.36686	0	0	3.5503	3.5503
KP16	0	0	55.8442	0.649351	0	0	1.2987	1.94805
KP17	0	0	5.43478	7.06522	0	0	0	0
KP18	0	0	221.192	2.64901	0	0	5.29801	0.662252
KP20	0	0	0	1.51134	0	0	0	11.0831
KP21	0	0	13.5135	0.540541	0	0	3.78378	0
KP22	0	0	98.5075	0	9.95025	0	5.97015	0
KP26	0	0	0	0	0	0	0	0
KP27	0	0	0	0	0	0	0	0
KP28	0	0.543478	0	0	0	0	0	0
KP29	0.588235	0	0	0	0	0	0	0
KP30	0	0	0.595238	0	0	3.57143	1.19048	0
KP31	0.653595	0	0	0.653595	0	0	0	4.57516
KP32	0	8.82353	11.7647	0	0	1.17647	0	0.588235
KP33	0	0	1.79641	0	0	0	0.598802	0.598802
KP34	0	0	52.3256	0	0	2.90698	31.9767	1.16279
KP35	0	24.0223	0	0	0	0.558659	0	0
KP36	6.32911	3.16456	3.16456	0	0	0	0.632911	0
KP37	0	0	30.5389	0	0	34.1317	2.99401	0
KP38	1.02564	0	0	0	0	0	3.58974	0
KP39	0	0	0	0	0	0	0	0
KP40	0	1.21951	0	0	0	0	0	0
KP41	0	0	0	0	0	0	0	0
KP42	1.35135	0	5.40541	0	0	0	4.72973	0
KP43	1.16959	0	17.5439	0.584795	0	0	5.84795	2.92398
KP44	1.2987	0	27.9221	0	0	0	1.2987	0
KP45	5.88235	0	29.4118	0	0	0	36.1345	0
KP5	0	0	0	11.8919	0	0	21.6216	7.02703
KP50	9.72222	0	0	0	0	0	6.94444	0
KP51	2.75862	0	0	0	0	0	1.37931	2.06897
KP52	1.28205	0	0	0	0	0	0.641026	0
KP53	0	0	0	0	0	0	0.763359	0
KP54	0.623053	0	0.623053	0	0	0	0	0
KP55	0	0	0	0	0	0.632911	1.26582	0
KP56	0	0	0	0	0	0	0	0
KP57	0	6.0241	0	0	0	0	0	0
KP58	0	0	0	0	0	0	0	0
KP59	0	0	0	0	0	2.45902	0	0
KP60	3.9604	0	0	0	0	0	0	0
KP61	0	15.3333	0	0	0	0	0	0
KP63	0	0	0	0	0	0	0	0
KP64	0	0	0	0	0	0	0	0
KP65	0	0	0	0	0	0	0	0
KP67	0	0	0	0.454545	0	22.7273	0	0
KP68	0	0	0	0	0	0	0.877193	0
KP69	1.1976	0	0.598802	0	0	0	0.598802	1.79641
KP7	9.40171	0	0	0	0	0	2.5641	0
KP70	8.69565	0	0	0	0	0	9.42029	0
KP73	0.42735	0	17.094	0	0	0	21.3675	5.55556
KP9	0	0	0	0	0	0	0.833333	0
P1	0	0	0	0	0	0	0	0
P10	2.04082	0	0	0	0	0	11.5646	1.36054
P11	2.47934	0	0	0	275.207	0	22.314	0
P12	0.662252	0.662252	0	0	0	0	4.63576	0
P13	3.5461	0	0	0	7.0922	0	1.41844	0
P2	0	1.27389	0	0	0	0	0	0
P3	0	0	0	0	0	0	0	0
P4	1.20846	22.3565	0	0	0	0	0	0
P5	8.69565	0	163.768	0	1.44928	0	1.44928	0
P6	4.31655	0	21.5827	0	0.719424	0	11.5108	0
P7	0.606061	0	0	0	0	0	0	0
P8	0	0	34.7222	0	104.167	0.694444	43.0556	0
P9	0.699301	0	0.699301	0	0	0	14.6853	0
