# Supplementary material for: Broad-scale spatial distribution, microhabitat association and habitat partitioning of damselfishes (family Pomacentridae) on an Okinawan coral reef
Source: PeerJ. 2025 Feb 14;13:e18977. doi: 10.7717/peerj.18977 (PMC11831974; doi:10.7717/peerj.18977)
Supplement: Supplemental Information 13 [file peerj-13-18977-s013.xls]

## Sheet: Figure 3 raw data
Site	(A) A. curacao	(B) C. ternatensis	(C) D. aruanus	(D) D. reticulatus	(E) P alexanderae	(F) P. amboinensis	(G) C. parasema	(H) P. sp.2
KP1	4.51128	1.50376	0	0	15.7895	0	0	0
KP11	0	0	0	0	0	0	0	0
KP13	0	0	0	0	0	0	0	0
KP14	0	0	0	0	81.4815	3.7037	0	0
KP15	2.95858	0	10.6509	0	8.28402	17.1598	1.18343	0
KP16	9.09091	0	94.8052	0	15.5844	19.4805	8.44156	0
KP17	0	0	6.52174	0	0	13.587	0	0
KP18	21.8543	0	44.3709	0	6.62252	15.2318	24.5033	0
KP20	0	0	0	0	0	5.03778	0	0
KP21	3.24324	0	6.48649	0	4.86486	18.3784	3.24324	0
KP22	0	0	33.3333	2.48756	0.995025	19.9005	0	0
KP26	0	0	0	0	0	0	0	0
KP27	0	0	0	0	0	0	0	0
KP28	0	0	0	5.97826	0	0	0	0
KP29	1.17647	0	25.8824	10	0.588235	40.5882	0	0
KP30	0	0	27.9762	7.14286	0	32.7381	0	0
KP31	3.26797	0	9.80392	0	28.7582	48.366	0	0
KP32	0	0	23.5294	4.70588	0	25.8824	0	0
KP33	0	0	11.3772	2.99401	0.598802	49.7006	0	0
KP34	2.32558	0	18.0233	3.48837	0	38.9535	0	0
KP35	0.558659	0	0.558659	0	1.11732	16.2011	0	0
KP36	1.26582	0	18.3544	15.8228	19.6203	43.6709	0	0
KP37	0	0	10.1796	25.7485	0	69.4611	0	0
KP38	0	0	0	0	0	2.5641	0	0
KP39	0	0	0	0	0	0	0	0
KP40	0	0	0	0	0	0	0	0
KP41	0	0	0	0	0	0	0	0
KP42	0	0	25	20.9459	67.5676	79.7297	0	0
KP43	4.09357	0	12.2807	0	8.18713	7.60234	17.5439	2.33918
KP44	1.2987	0	7.14286	0	113.636	3.24675	64.2857	4.54545
KP45	0	0	12.605	0	246.218	12.605	114.286	1.68067
KP5	0	0	1.62162	0	0.540541	9.18919	0	0
KP50	5.55556	0	0	0	52.7778	0.694444	115.972	1.38889
KP51	6.89655	0	0	0	15.8621	8.96552	6.89655	2.06897
KP52	0	0	3.84615	0.641026	10.8974	19.8718	0	0
KP53	0	0	0	0	0	0	286.26	5.34351
KP54	13.7072	0	14.3302	0	1.86916	3.11526	104.05	0.623053
KP55	0	0	0	0	0	12.6582	0	0
KP56	1.24224	0	0	0	0	0	0	0
KP57	0	0	0	0	0	0	0	0
KP58	0	0	0	0	0	0	0	0
KP59	0	0	0	0	0	0	0	0
KP60	0	0	0	0	0	0	0	0
KP61	0	0	0	0	0	0	0	0
KP63	0	0	0	0	0	0	0	0
KP64	0	0	0	0	0	0	0	0
KP65	0	0	0	0	0	0	0	0
KP67	0	0	0	0	0	7.27273	0	0
KP68	0.877193	0	0	0	13.1579	11.4035	0	0
KP69	20.3593	0	0	0	6.58683	1.79641	8.98204	26.3473
KP7	0	0	0	0	0	0	0	0
KP70	17.3913	0	33.3333	0	108.696	16.6667	36.2319	6.52174
KP73	2.13675	0	0	0	3.84615	14.1026	0.42735	0
KP9	0	0	0	0	0	0	0	0
P1	0	0	0	0	0	0	0	0
P10	1.36054	0	0	0	86.3946	4.08163	0	0
P11	0	0	0	0	71.0744	4.13223	0	0
P12	0.662252	0	0	0	119.205	5.29801	0	0
P13	14.8936	0	0.70922	0.70922	202.837	6.38298	26.2411	1.41844
P2	0	0	0	0	0.636943	0	0	0
P3	0	8.47458	0	0	0.564972	0.564972	0	0
P4	0	0	0	1.20846	2.41692	1.81269	0	0
P5	10.8696	30.4348	0	0	353.623	0	20.2899	10.1449
P6	16.5468	0	0	0	192.086	0.719424	30.2158	2.15827
P7	10.9091	0	0	0	118.788	0	16.3636	4.84848
P8	0	0	9.72222	18.0556	176.389	25	0.694444	0
P9	0	0	0	21.6783	106.993	3.4965	0	0
