# Supplementary material for: Broad-scale spatial distribution, microhabitat association and habitat partitioning of damselfishes (family Pomacentridae) on an Okinawan coral reef
Source: PeerJ. 2025 Feb 14;13:e18977. doi: 10.7717/peerj.18977 (PMC11831974; doi:10.7717/peerj.18977)
Supplement: Supplemental Information 14 [file peerj-13-18977-s014.xls]

## Sheet: Sheet1
(A) Environmental variable vectors				(B) Species score					(C) Site score (67 sites)						(D) Abudefduf (1 species)					(E) Amblyglyphidodon (2 species)				(F) Chromis (7 species)					(G) Chrysiptera (3 species)					(H) Dascyllus (2 species)					(I) Neopomacentrus (1 species)					(J) Pomacentrus (9 species)					(K) Pomachromis (1 species)
Vector name	CCA axis 1	CCA axis 2		Species name	CCA axis 1	CCA axis 2	Color		Site name	CCA axis 1	CCA axis 2	Site	Color		Species name	CCA axis 1	CCA axis 2	Color		Species name	CCA axis 1	CCA axis 2	Color	Species name	CCA axis 1	CCA axis 2	Color		Species name	CCA axis 1	CCA axis 2	Color		Species name	CCA axis 1	CCA axis 2	Color		Species name	CCA axis 1	CCA axis 2	Color		Species name	CCA axis 1	CCA axis 2	Color		Species name
PC axis 1	-0.9848	-0.1732		Ab.vai	1.4048	-0.0243	Gray		KP1	-0.1183	0.4753	Exposed reefs	Magenta		Ab.vai	1.4048	-0.0243	Gray		Am.cur	-0.7568	0.3864	Green	C.atr	1.3257	-0.1108	Sky-blue		Ch.cya	-0.9977	-0.4268	Purple		D.aru	-0.7705	-0.7877	Magenta		N.ana	-0.4072	0.204	White		P.ale	-0.5475	0.3687	Orange		Po.ric
PC axis 2	0.1732	-0.7009		Am.cur	-0.7568	0.3864	Green		KP11	1.1252	0.2639	Exposed reefs	Magenta							Am.leu	-0.2575	0.6127	Green	C.chr	0.6181	-0.7784	Sky-blue		Ch.par	-0.9509	0.9789	Purple		D.ret	-0.5038	-0.9201	Magenta							P.amb	-0.6319	-0.5857	Orange
PC axis 3	-0.0345	0.6588		Am.leu	-0.2575	0.6127	Green		KP13	0.9958	0.3312	Exposed reefs	Magenta											C.mar	0.9436	0.033	Sky-blue		Ch.rex	0.7303	0.0154	Purple												P.coe	-0.6	-1.033	Orange
				C.atr	1.3257	-0.1108	Sky-blue		KP14	-0.3187	-0.4436	Exposed reefs	Magenta											C.ova	1.006	-0.0445	Sky-blue																	P.lep	0.3735	0.1154	Orange
				C.chr	0.6181	-0.7784	Sky-blue		KP26	1.6574	-0.0048	Exposed reefs	Magenta											C.tar	-0.1609	0.7336	Sky-blue																	P.mol	-0.6295	0.1322	Orange
				C.mar	0.9436	0.033	Sky-blue		KP27	1.4345	0.1059	Exposed reefs	Magenta											C.van	1.2997	-0.0573	Sky-blue																	P.phi	0.6876	0.0869	Orange
				C.ova	1.006	-0.0445	Sky-blue		KP28	0.9634	-0.6284	Exposed reefs	Magenta											C.vir	-0.8002	-0.3961	Sky-blue																	P.sp1	-0.8907	0.0586	Orange
				C.ter	-0.1609	0.7336	Sky-blue		KP32	0.1104	-1.6878	Exposed reefs	Magenta																															P.sp2	-0.9655	1.402	Orange
				C.van	1.2997	-0.0573	Sky-blue		KP38	0.7433	0.1743	Exposed reefs	Magenta																															P.vai	0.5398	0.0363	Orange
				C.vir	-0.8002	-0.3961	Sky-blue		KP39	1.445	0.142	Exposed reefs	Magenta
				Ch.cya	-0.9977	-0.4268	Purple		KP40	1.4358	0.0116	Exposed reefs	Magenta
				Ch.par	-0.9509	0.9789	Purple		KP41	1.5209	0.0267	Exposed reefs	Magenta
				Ch.rex	0.7303	0.0154	Purple		KP56	0.9451	0.4697	Exposed reefs	Magenta
				D.aru	-0.7705	-0.7877	Magenta		KP57	1.2623	-0.2421	Exposed reefs	Magenta
				D.ret	-0.5038	-0.9201	Magenta		KP58	1.6027	0.0545	Exposed reefs	Magenta
				N.ana	-0.4072	0.204	White		KP59	1.5224	-0.2755	Exposed reefs	Magenta
				P.ale	-0.5475	0.3687	Orange		KP60	1.6146	0.1773	Exposed reefs	Magenta
				P.amb	-0.6319	-0.5857	Orange		KP61	1.5556	-0.3571	Exposed reefs	Magenta
				P.coe	-0.6	-1.033	Orange		KP63	1.6134	0.0881	Exposed reefs	Magenta
				P.lep	0.3735	0.1154	Orange		KP64	1.6761	0.0049	Exposed reefs	Magenta
				P.mol	-0.6295	0.1322	Orange		KP65	1.4602	0.1264	Exposed reefs	Magenta
				P.phi	0.6876	0.0869	Orange		KP68	0.5714	0.1206	Exposed reefs	Magenta
				P.sp1	-0.8907	0.0586	Orange		KP7	0.8709	0.4964	Exposed reefs	Magenta
				P.sp2	-0.9655	1.402	Orange		KP9	1.0814	0.2421	Exposed reefs	Magenta
				P.vai	0.5398	0.0363	Orange		P1	1.4169	0.1366	Exposed reefs	Magenta
				Po.ric	0.4793	-0.0096	Black		P10	0.0035	0.5215	Exposed reefs	Magenta
									P11	0.1566	0.5133	Exposed reefs	Magenta
									P12	-0.1662	0.4715	Exposed reefs	Magenta
									P2	1.3998	0.0154	Exposed reefs	Magenta
									P3	1.156	0.43	Exposed reefs	Magenta
									P4	0.7589	-0.7455	Exposed reefs	Magenta
									KP15	-1.4628	-0.795	Inner reefs	Yellow
									KP16	-1.3726	-0.6068	Inner reefs	Yellow
									KP17	-0.9066	-2.0009	Inner reefs	Yellow
									KP18	-1.455	-0.3693	Inner reefs	Yellow
									KP20	-1.616	-1.2007	Inner reefs	Yellow
									KP21	-1.1427	-0.483	Inner reefs	Yellow
									KP22	-1.3016	-1.8027	Inner reefs	Yellow
									KP29	-0.5016	-1.7971	Inner reefs	Yellow
									KP30	-0.9439	-2.9072	Inner reefs	Yellow
									KP31	-0.8808	-0.6094	Inner reefs	Yellow
									KP33	-1.1354	-2.4525	Inner reefs	Yellow
									KP34	-0.9239	-1.5522	Inner reefs	Yellow
									KP35	0.3569	-1.3692	Inner reefs	Yellow
									KP36	-0.632	-1.222	Inner reefs	Yellow
									KP37	-0.7145	-2.3991	Inner reefs	Yellow
									KP42	-0.9132	-1.3166	Inner reefs	Yellow
									KP43	-1.4187	0.5121	Inner reefs	Yellow
									KP44	-1.4029	1.2672	Inner reefs	Yellow
									KP45	-1.0602	0.8262	Inner reefs	Yellow
									KP5	-1.3443	-0.9557	Inner reefs	Yellow
									KP50	-1.3423	2.7746	Inner reefs	Yellow
									KP51	-1.1744	1.6886	Inner reefs	Yellow
									KP52	-0.0548	-0.3802	Inner reefs	Yellow
									KP53	-1.8353	4.8902	Inner reefs	Yellow
									KP54	-1.5505	1.3028	Inner reefs	Yellow
									KP55	0.4976	-0.3814	Inner reefs	Yellow
									KP67	0.2823	-1.4606	Inner reefs	Yellow
									KP69	-1.5303	2.8705	Inner reefs	Yellow
									KP70	-1.0197	1.1549	Inner reefs	Yellow
									KP73	-0.8654	-0.0871	Inner reefs	Yellow
									P13	-1.2659	1.6712	Inner reefs	Yellow
									P5	-1.1433	2.0732	Inner reefs	Yellow
									P6	-1.3536	1.8103	Inner reefs	Yellow
									P7	-1.4405	3.2253	Inner reefs	Yellow
									P8	-0.6372	-0.5863	Inner reefs	Yellow
									P9	0.0337	-0.1264	Inner reefs	Yellow
[truncated: 3 more columns]
