# Supplementary material for: Broad-scale spatial distribution, microhabitat association and habitat partitioning of damselfishes (family Pomacentridae) on an Okinawan coral reef
Source: PeerJ. 2025 Feb 14;13:e18977. doi: 10.7717/peerj.18977 (PMC11831974; doi:10.7717/peerj.18977)
Supplement: Supplemental Information 16 [file peerj-13-18977-s016.xls]

## Sheet: Sheet1
Substrate	(A) Ch.rex	(B) P. phillippinus	(C) Ab.vaigiensis	(D) C.vanderbilti	(E) C.atripes	(F) C.ovatiforms	Proportion of substrates
Staghorn Acropora	0	1	0	0	1	0	0.0420922
Branching Acropora	8	6	0	0	0	0	0.0385572
Bottlebrush Acropora	1	0	0	0	0	0	0.0235664
Corymbose Acropora	3	2	0	0	0	0	0.0250065
Tabular Acropora	1	0	0	0	0	0	0.0139434
Pocillopora	0	27	0	0	1	0	0.0119796
Branching Isopora	0	0	0	0	0	0	0.0292616
Branching Millepora	2	9	0	0	3	1	0.0312909
Branching Porites	0	0	0	0	0	0	0.0287379
Branching corals	0	0	0	0	2	0	0.00314218
Foliose corals	0	2	0	0	2	0	0.0111286
Massive corals	1	4	0	2	0	0	0.0435323
Other corals	6	1	0	0	0	0	0.0760016
Dead corals*	4	1	0	0	0	0	0.114166
Soft corals	1	2	0	0	0	0	0.00687353
Rock	194	501	58	54	141	14	0.332351
Coral rubble	1	0	0	0	0	0	0.12608
Sand	0	0	0	0	0	0	0.0190495
Macroalgae	0	0	0	0	0	0	0.0232391
	222	556	58	56	150	15
