# Supplementary material for: Broad-scale spatial distribution, microhabitat association and habitat partitioning of damselfishes (family Pomacentridae) on an Okinawan coral reef
Source: PeerJ. 2025 Feb 14;13:e18977. doi: 10.7717/peerj.18977 (PMC11831974; doi:10.7717/peerj.18977)
Supplement: Supplemental Information 17 [file peerj-13-18977-s017.xls]

## Sheet: Sheet1
Substrate	(A) P.sp2	(B) Ch.cyanea	(C) D.aruanus	(D) D. reticulatus	(E) C. ternatensis	(F) P. lepidogenys	(G) Ch. parasema	Proportion of substrates
Staghorn Acropora	0	0	2	5	5	88	115	0.0420922
Branching Acropora	0	24	7	8	18	686	558	0.0385572
Bottlebrush Acropora	5	7	0	0	0	36	193	0.0235664
Corymbose Acropora	0	5	23	38	0	79	76	0.0250065
Tabular Acropora	0	0	0	0	0	22	0	0.0139434
Pocillopora	0	0	24	36	0	17	1	0.0119796
Branching Isopora	0	34	4	20	0	10	109	0.0292616
Branching Millepora	0	6	7	0	0	300	145	0.0312909
Branching Porites	0	0	2	0	9	4	71	0.0287379
Branching corals	0	0	4	0	0	14	0	0.00314218
Foliose corals	0	0	0	0	0	21	36	0.0111286
Massive corals	0	0	0	0	0	79	0	0.0435323
Other corals	0	0	0	2	0	5	97	0.0760016
Dead corals*	29	0	1	3	4	215	46	0.114166
Soft corals	0	0	0	0	0	19	0	0.00687353
Rock	9	10	0	0	0	510	0	0.332351
Coral rubble	27	89	0	0	0	0	0	0.12608
Sand	0	0	0	0	0	0	0	0.0190495
Macroalgae	0	0	0	0	0	0	0	0.0232391
