# Supplementary material for: Broad-scale spatial distribution, microhabitat association and habitat partitioning of damselfishes (family Pomacentridae) on an Okinawan coral reef
Source: PeerJ. 2025 Feb 14;13:e18977. doi: 10.7717/peerj.18977 (PMC11831974; doi:10.7717/peerj.18977)
Supplement: Supplemental Information 18 [file peerj-13-18977-s018.xls]

## Sheet: Sheet1
Substrate	(A) C.viridis	(B) P.moluccensis	(C) P.alexanderae	(D) Am.curacao	(E) Am.leucogaster	(F) P. amboinensis	(G) N.anabatoides	Proportion of substrates
Staghorn Acropora	22	26	168	60	116	5	11	0.0420922
Branching Acropora	683	96	301	3	52	11	0	0.0385572
Bottlebrush Acropora	0	21	95	4	8	8	0	0.0235664
Corymbose Acropora	143	93	21	0	0	2	0	0.0250065
Tabular Acropora	0	0	0	0	0	0	0	0.0139434
Pocillopora	15	2	0	0	1	0	0	0.0119796
Branching Isopora	732	245	502	9	3	1	0	0.0292616
Branching Millepora	61	225	216	29	23	58	1	0.0312909
Branching Porites	1426	186	941	79	13	6	72	0.0287379
Branching corals	0	1	4	0	0	6	0	0.00314218
Foliose corals	10	21	345	0	3	0	10	0.0111286
Massive corals	0	1	14	0	0	1	0	0.0435323
Other corals	0	0	33	0	0	0	0	0.0760016
Dead corals*	10	33	337	5	2	10	50	0.114166
Soft corals	0	0	0	0	0	0	0	0.00687353
Rock	0	1	79	6	12	32	10	0.332351
Coral rubble	0	0	0	0	0	10	0	0.12608
Sand	0	0	0	0	0	0	0	0.0190495
Macroalgae	0	0	0	0	0	0	0	0.0232391
