# Supplementary material for: Broad-scale spatial distribution, microhabitat association and habitat partitioning of damselfishes (family Pomacentridae) on an Okinawan coral reef
Source: PeerJ. 2025 Feb 14;13:e18977. doi: 10.7717/peerj.18977 (PMC11831974; doi:10.7717/peerj.18977)
Supplement: Supplemental Information 19 [file peerj-13-18977-s019.xls]

## Sheet: Sheet1
Substrate utilized by the focal fish species	Pomacentrus sp.1	Pomacentrus vaiuli	Chromis margaritifer	Chromis chrysura	Pomachromis richardsoni	Pomacentrus coelestis	Chrysiptera rex	Pomacentrus phillippnus	Abdefduf vaigiensis	Chromis vanderbilti	Chromis atripes	Chromis ovatiforms	Pomacentrus sp.2	Chrysiptera cyanea	Dascyllus aruanus	Dascyllus reticulatus	Chromis ternatensis	Pomacentrus lepidogenys	Chrysiptera parasema	Chromis viridis	Pomacentrus moluccensis	Pomacentrus alexanderae	Amblyglyphidodon curacao	Amblyglyphidodon laucogaster	Pomacentrus amboinensis	Neopomacentrus anabatoides
Staghorn Acropora	0	1	4	0	2	0	0	1	0	0	1	0	0	0	2	5	5	88	115	22	26	168	60	116	5	11
Branching Acropora	0	8	37	0	18	0	8	6	0	0	0	0	0	24	7	8	18	686	558	683	96	301	3	52	11	0
Bottlebrush Acropora	2	3	0	0	0	0	1	0	0	0	0	0	5	7	0	0	0	36	193	0	21	95	4	8	8	0
Corymbose Acropora	2	4	37	0	0	1	3	2	0	0	0	0	0	5	23	38	0	79	76	143	93	21	0	0	2	0
Tabular Acropora	0	1	12	0	0	0	1	0	0	0	0	0	0	0	0	0	0	22	0	0	0	0	0	0	0	0
Pocillopora	0	1	22	0	0	0	0	27	0	0	1	0	0	0	24	36	0	17	1	15	2	0	0	1	0	0
Branching Isopora	1	0	0	0	0	0	0	0	0	0	0	0	0	34	4	20	0	10	109	732	245	502	9	3	1	0
Branching Millepora	1	9	27	8	11	0	2	9	0	0	3	1	0	6	7	0	0	300	145	61	225	216	29	23	58	1
Branching Porites	2	2	1	0	0	0	0	0	0	0	0	0	0	0	2	0	9	4	71	1426	186	941	79	13	6	72
Branching corals	0	0	0	0	3	0	0	0	0	0	2	0	0	0	4	0	0	14	0	0	1	4	0	0	6	0
Foliose corals	0	0	0	0	0	0	0	2	0	0	2	0	0	0	0	0	0	21	36	10	21	345	0	3	0	10
Massive corals	4	3	16	0	0	0	1	4	0	2	0	0	0	0	0	0	0	79	0	0	1	14	0	0	1	0
Other corals	0	1	10	3	0	0	6	1	0	0	0	0	0	0	0	2	0	5	97	0	0	33	0	0	0	0
Dead Staghorn Acropora	0	3	3	0	6	0	2	1	0	0	0	0	25	0	0	3	4	91	4	0	0	9	2	2	0	0
Dead Branching Acropora	2	1	2	0	0	0	1	0	0	0	0	0	0	0	0	0	0	83	22	0	3	18	0	0	0	0
Dead Bottlebrush Acropora	0	0	0	0	0	0	0	0	0	0	0	0	4	0	0	0	0	0	6	0	1	32	0	0	2	0
Dead Corymbose Acropora	0	1	2	0	0	1	0	0	0	0	0	0	0	0	0	0	0	9	3	0	19	51	3	0	4	0
Dead Tabular Acropora	4	0	0	0	0	0	1	0	0	0	0	0	0	0	0	0	0	0	0	0	0	10	0	0	0	0
Dead Pocillopora	0	0	0	0	0	0	0	0	0	0	0	0	0	0	1	0	0	0	2	0	0	32	0	0	0	0
Dead Branching Isopora	0	1	0	0	0	0	0	0	0	0	0	0	0	0	0	0	0	6	2	0	8	63	0	0	1	0
Dead Branching Millepora	0	1	0	0	0	0	0	0	0	0	0	0	0	0	0	0	0	20	7	0	1	6	0	0	0	0
Dead Branching Porites	0	0	0	0	0	0	0	0	0	0	0	0	0	0	0	0	0	6	0	10	0	116	0	0	2	50
Dead Branching corals	0	0	0	0	1	0	0	0	0	0	0	0	0	0	0	0	0	0	0	0	1	0	0	0	0	0
Dead Foliose corals	0	0	0	0	0	0	0	0	0	0	0	0	0	0	0	0	0	0	0	0	0	0	0	0	0	0
Dead Massive corals	0	0	0	0	0	0	0	0	0	0	0	0	0	0	0	0	0	0	0	0	0	0	0	0	1	0
Dead Other corals	0	0	0	0	0	0	0	0	0	0	0	0	0	0	0	0	0	0	0	0	0	0	0	0	0	0
Soft corals	0	0	6	0	0	0	1	2	0	0	0	0	0	0	0	0	0	19	0	0	0	0	0	0	0	0
Rock	20	97	388	37	182	11	194	501	58	54	141	14	9	10	0	0	0	510	0	0	1	79	6	12	32	10
Coral rubble	7	3	0	0	0	0	1	0	0	0	0	0	27	89	0	0	0	0	0	0	0	0	0	0	10	0
Sand	0	0	0	0	0	0	0	0	0	0	0	0	0	0	0	0	0	0	0	0	0	0	0	0	0	0
Macroalgae	0	0	0	0	0	0	0	0	0	0	0	0	0	0	0	0	0	0	0	0	0	0	0	0	0	0
