# Supplementary material for: Broad-scale spatial distribution, microhabitat association and habitat partitioning of damselfishes (family Pomacentridae) on an Okinawan coral reef
Source: PeerJ. 2025 Feb 14;13:e18977. doi: 10.7717/peerj.18977 (PMC11831974; doi:10.7717/peerj.18977)
Supplement: Supplemental Information 20 [file peerj-13-18977-s020.xls]

## Sheet: Figure 9 raw data
	(A) A.curacao			(B) A. leucogaster			(C) C. chrysura			(D) C. viridis			(E) C. cyanea			(F) C. parasema			(G) D. aruanus			(H) D. reticulatus			(I) N. anabatoides			(J) P. amboinensis			(K) P. coelestis			(L) P. vaiuli			(M) P. sp.1			(N) P. sp.2
Species that is compared with the focal species	X-axis (Broad-scale)	Y-axis (Microhabitat scale)		X-axis (Broad-scale)	Y-axis (Microhabitat scale)		X-axis (Broad-scale)	Y-axis (Microhabitat scale)		X-axis (Broad-scale)	Y-axis (Microhabitat scale)		X-axis (Broad-scale)	Y-axis (Microhabitat scale)		X-axis (Broad-scale)	Y-axis (Microhabitat scale)		X-axis (Broad-scale)	Y-axis (Microhabitat scale)		X-axis (Broad-scale)	Y-axis (Microhabitat scale)		X-axis (Broad-scale)	Y-axis (Microhabitat scale)		X-axis (Broad-scale)	Y-axis (Microhabitat scale)		X-axis (Broad-scale)	Y-axis (Microhabitat scale)		X-axis (Broad-scale)	Y-axis (Microhabitat scale)		X-axis (Broad-scale)	Y-axis (Microhabitat scale)		X-axis (Broad-scale)	Y-axis (Microhabitat scale)
P.lep	0.115242	0.549994		0.342933	0.491111		0.0406828	0.604476		0.0729669	0.316598		0.0110267	0.264424		0.00399223	0.758908		0.0163306	0.287626		0.0697383	0.189874		0.0548586	0.0863688		0.0506947	0.659893		0.0143885	0.554061		0.335055	0.647131		0.0185726	0.542147		0.00109673	0.197754
C.chr	0.0362137	0.974359		0.0424335	0.126508					0.00736367	0.00734539		0	0.110838		0	0.0591814		0.0553207	0.0418114		0.0657339	0.00277499		0	0.11125		0.127558	0.626273		0.0134556	0.966405		0.256005	0.983854		0.00727429	0.881797		0	0.228254
Po.ric	0.04463	0.992611		0.176853	0.150903		0.0179292	0.979798		0.0658924	0.0405536		0.0654755	0.127297		0.000486631	0.100461		0.0244898	0.0338643		0.0608544	0.0164752		0.0669751	0.112947		0.0867119	0.526372		0.0649087	0.984508		0.303478	0.996393		0.0506758	0.891393		4.22822e-05	0.253824
P.sp2	0	0.234261		0.257316	0.0394243		0	0.228254		0.155973	0		0.00211035	0.662566		0.28848	0.0439021		0.0762214	0		0.000673821	0.0342856		0.00292376	0.0261813		0.0478889	0.227624		0	0.232348		0.00670172	0.277086		0.101722	0.441617
Ab.vai				0.132857	0.0917958		0.0362137	0.974359		0	0		0	0.100692		0	0		0	0		0	0		0	0.111761		0	0.461784		0	0.991837		0.103605	0.989075		0	0.895323		0	0.234261
C.ter	0	0		0.315267	0.594406		0	0		0.417597	0.68307		0	0.205974		0.0545443	0.82682		0	0.206749		0	0.150524		0.00473512	0.372032		0.00091617	0.189278		0	0		0.08475	0.0864258		0	0.0381553		0.319438	0.123251
Am.cur	0	0.0576364		0.41312	0.657306		0.00968476	0.114847		0.456178	0.682926		0.0747589	0.0619043		0.287553	0.299911		0.44225	0.146527		0.0212523	0.0860417		0.00930992	0.691069		0.200129	0.378994		0.00312134	0.0597643		0.0356549	0.108332		0.149755	0.139329		0.61651	0.0310044
P.vai	0.103605	0.989075		0.204236	0.152882		0.256005	0.983854		0.105809	0.0552165		0.14558	0.156473		0.0227363	0.111386		0.0314768	0.069673		0.161441	0.0479939		0.0706735	0.12923		0.142281	0.559299		0.100659	0.985598					0.123518	0.913843		0.00670172	0.277086
C.mar	0.15033	0.985314		0.0280063	0.149697		0.0575153	0.976501		0.00138879	0.0494284		0.0070619	0.130793		0.000161249	0.113897		0.00634555	0.132264		0.0164031	0.113418		0.0103378	0.114179		0.0128768	0.53185		0.0376269	0.986201		0.117082	0.995214		0.0063208	0.901614		0.000539272	0.235778
Ch.par	0	0		0.258012	0.575832		0	0.0591814		0.106228	0.517678		0.0112223	0.307213					0.14205	0.329477		0.00178128	0.281509		0.00293663	0.119126		0.0625484	0.388453		2.8903e-05	0.0110325		0.0227363	0.111386		0.0179705	0.0678092		0.28848	0.0439021
P.coe	0	0.991837		0	0.0910465		0.0134556	0.966405		0.0666964	0.00736989		0.348421	0.10441		2.8903e-05	0.0110325		0.086243	0.0587983		0.409523	0.0601762		0.0052692	0.110849		0.377919	0.465821					0.100659	0.985598		0.240663	0.896087		0	0.232348
C.vir	0	0		0.576743	0.263437		0.00736367	0.00734539					0.0840779	0.243803		0.106228	0.517678		0.397395	0.237916		0.104741	0.26289		0.0404276	0.661645		0.204962	0.171194		0.0666964	0.00736989		0.105809	0.0552165		0.0683559	0.100584		0.155973	0
Am.leu	0.132857	0.0917958					0.0424335	0.126508		0.576743	0.263437		0.00177646	0.128171		0.258012	0.575832		0.146806	0.17763		0.107098	0.147515		0.0832679	0.203902		0.162951	0.332827		0	0.0910465		0.204236	0.152882		0.0350238	0.105473		0.257316	0.0394243
P.amb	0	0.461784		0.162951	0.332827		0.127558	0.626273		0.204962	0.171194		0.117959	0.279279		0.0625484	0.388453		0.574414	0.236896		0.717523	0.0529698		0.0818925	0.155635					0.377919	0.465821		0.142281	0.559299		0.226761	0.520037		0.0478889	0.227624
P.mol	0	0.00246099		0.282456	0.312149		0.00149575	0.119052		0.261151	0.756751		0.46686	0.312379		0.197128	0.537915		0.227551	0.407625		0.325226	0.406458		0.406711	0.388444		0.335966	0.570921		0.253843	0.0272937		0.239721	0.0943277		0.437076	0.121186		0.0789587	0.00755872
C.van	0.000899642	0.999315		0	0.0917329		0.00520406	0.973692		0.000646423	0		0	0.100623		0	0		0.00396073	0		0.00215591	0		0	0.111685		0.00350585	0.462002		0.0339628	0.991157		0.00690581	0.98953		0.000700182	0.901337		0	0.2341
C.atr	0.977514	0.999522		0.133834	0.102164		0.0309748	0.978374		0	0.000972439		0	0.101929		0	0.00684009		0	0.0110542		0.000626993	0.00510447		0.0178335	0.114402		0.000900073	0.481102		0	0.991363		0.135615	0.990699		0	0.895847		0	0.234149
P.phi	0.529042	0.998258		0.214835	0.101848		0.170698	0.976597		0.0581248	0.00612724		0.00422641	0.10469		0.00320597	0.0158007		0.0172658	0.0452509		0.0410687	0.0387038		0.0389238	0.112458		0.0378952	0.47826		0.0124836	0.990468		0.357863	0.991029		0.0084437	0.89635		0.00732044	0.235149
D.ret	0	0		0.107098	0.147515		0.0657339	0.00277499		0.104741	0.26289		0	0.187808		0.00178128	0.281509		0.308511	0.938133					0.132787	0.0107956		0.717523	0.0529698		0.409523	0.0601762		0.161441	0.0479939		0.00938109	0.075477		0.000673821	0.0342856
C.ova	0.663571	0.997459		0.154536	0.104098		0.133259	0.986893		0.000195958	0.00248413		0.00240786	0.104741		0	0.0160006		0.00924382	0.0141402		0.0182354	0		0.307761	0.112274		0.0411219	0.520243		0	0.989316		0.270263	0.9931		0.0190137	0.896237		0	0.233665
D.aru	0	0		0.146806	0.17763		0.0553207	0.0418114		0.397395	0.237916		0.101684	0.131609		0.14205	0.329477					0.308511	0.938133		0.0344606	0.0548186		0.574414	0.236896		0.086243	0.0587983		0.0314768	0.069673		0.154262	0.0774229		0.0762214	0
P.sp1	0	0.895323		0.0350238	0.105473		0.00727429	0.881797		0.0683559	0.100584		0.667542	0.399824		0.0179705	0.0678092		0.154262	0.0774229		0.00938109	0.075477		0	0.172608		0.226761	0.520037		0.240663	0.896087		0.123518	0.913843					0.101722	0.441617
P.ale	0	0.0653448		0.483223	0.358181		0.00941813	0.103465		0.339499	0.916913		0.101936	0.226109		0.29901	0.482576		0.167102	0.196431		0.242866	0.205979		0.21812	0.738216		0.214943	0.319394		0.0644947	0.0701812		0.147355	0.123763		0.101731	0.168256		0.357319	0.0331344
N.ana	0	0.111761		0.0832679	0.203902		0	0.11125		0.0404276	0.661645		0	0.0119287		0.00293663	0.119126		0.0344606	0.0548186		0.132787	0.0107956					0.0818925	0.155635		0.0052692	0.110849		0.0706735	0.12923		0	0.172608		0.00292376	0.0261813
Ch.cya	0	0.100692		0.00177646	0.128171		0	0.110838		0.0840779	0.243803					0.0112223	0.307213		0.101684	0.131609		0	0.187808		0	0.0119287		0.117959	0.279279		0.348421	0.10441		0.14558	0.156473		0.667542	0.399824		0.00211035	0.662566
Ch.rex	0.158743	0.998357		0.0817501	0.110305		0.064961	0.977366		0.022746	0.0176928		0.185006	0.116849		0.00136218	0.0461251		0.0153035	0.020281		0.0517301	0.0177147		0.0114815	0.111693		0.0610823	0.478031		0.187458	0.991599		0.346226	0.993589		0.132947	0.900072		0.00281055	0.24486
