# Supplementary material for: Broad-scale spatial distribution, microhabitat association and habitat partitioning of damselfishes (family Pomacentridae) on an Okinawan coral reef
Source: PeerJ. 2025 Feb 14;13:e18977. doi: 10.7717/peerj.18977 (PMC11831974; doi:10.7717/peerj.18977)
Supplement: Supplemental Information 21 [file peerj-13-18977-s021.xls]

## Sheet: Sheet1
	(A) Ab.vaigiensis			(B) C. atripes			(C) C. ovatiformis			(D) C. margaritifer			(E) C. vanderbilti			(F) Ch. rex			(G) C. ternatensis			(H) P. alexanderae			(I) P. moluccensis			(J) P. lepidogenys			(K) P. phillippinus			(L) Po. richardsoni
Species that is compared with the focal species	X-axis (Broad-scale)	Y-axis (Microhabitat scale)		X-axis (Broad-scale)	Y-axis (Microhabitat scale)		X-axis (Broad-scale)	Y-axis (Microhabitat scale)		X-axis (Broad-scale)	Y-axis (Microhabitat scale)		X-axis (Broad-scale)	Y-axis (Microhabitat scale)		X-axis (Broad-scale)	Y-axis (Microhabitat scale)		X-axis (Broad-scale)	Y-axis (Microhabitat scale)		X-axis (Broad-scale)	Y-axis (Microhabitat scale)		X-axis (Broad-scale)	Y-axis (Microhabitat scale)		X-axis (Broad-scale)	Y-axis (Microhabitat scale)		X-axis (Broad-scale)	Y-axis (Microhabitat scale)		X-axis (Broad-scale)	Y-axis (Microhabitat scale)
P.lep	0.115242	0.549994		0.142287	0.55795		0.243103	0.571647		0.131409	0.649501		0.00695538	0.552771		0.312487	0.586695		0.036976	0.673441		0.0578231	0.314668		0.106612	0.394134		0.0406828	0.604476		0.585055	0.566254		0.647969	0.642459
C.chr	0.0362137	0.974359		0.0309748	0.978374		0.133259	0.986893		0.0575153	0.976501		0.00520406	0.973692		0.064961	0.977366		0	0		0.00941813	0.103465		0.00149575	0.119052					0.170698	0.976597		0.0179292	0.979798
Po.ric	0.04463	0.992611		0.0393357	0.993722		0.0663376	0.994363		0.352969	0.991731		0.335649	0.991931		0.493319	0.995976		0.00618106	0.0924535		0.0737799	0.101836		0.141923	0.0596071		0.0179292	0.979798		0.462742	0.993218
P.sp2	0	0.234261		0	0.234149		0	0.233665		0.000539272	0.235778		0	0.2341		0.00281055	0.24486		0.319438	0.123251		0.357319	0.0331344		0.0789587	0.00755872		0	0.228254		0.00732044	0.235149		4.22822e-05	0.253824
Ab.vai				0.977514	0.999522		0.663571	0.997459		0.15033	0.985314		0.000899642	0.999315		0.158743	0.998357		0	0		0	0.0653448		0	0.00246099		0.0362137	0.974359		0.529042	0.998258		0.04463	0.992611
C.ter	0	0		0.0291315	0.00167832		0.096525	0		0.00874207	0.0850149		0	0		0.00267501	0.0370391					0.547485	0.578217		0.0200033	0.411588		0	0		0.0336716	0.0110388		0.00618106	0.0924535
Am.cur	0	0.0576364		0	0.0676189		0.00591017	0.0773376		0.00197265	0.086673		0	0.0575969		0.0109534	0.0619908		0.219582	0.488065		0.485501	0.771752		0.185327	0.600915		0.00968476	0.114847		0.02892	0.0640628		0.0216271	0.0836677
P.vai	0.103605	0.989075		0.135615	0.990699		0.270263	0.9931		0.117082	0.995214		0.00690581	0.98953		0.346226	0.993589		0.08475	0.0864258		0.147355	0.123763		0.239721	0.0943277		0.256005	0.983854		0.357863	0.991029		0.303478	0.996393
C.mar	0.15033	0.985314		0.149113	0.98677		0.14729	0.987696					0.597975	0.986143		0.674236	0.991053		0.00874207	0.0850149		0.00798974	0.106559		0.0137943	0.086557		0.0575153	0.976501		0.394963	0.989801		0.352969	0.991731
Ch.par	0	0		0	0.00684009		0	0.0160006		0.000161249	0.113897		0	0		0.00136218	0.0461251		0.0545443	0.82682		0.29901	0.482576		0.197128	0.537915		0	0.0591814		0.00320597	0.0158007		0.000486631	0.100461
P.coe	0	0.991837		0	0.991363		0	0.989316		0.0376269	0.986201		0.0339628	0.991157		0.187458	0.991599		0	0		0.0644947	0.0701812		0.253843	0.0272937		0.0134556	0.966405		0.0124836	0.990468		0.0649087	0.984508
C.vir	0	0		0	0.000972439		0.000195958	0.00248413		0.00138879	0.0494284		0.000646423	0		0.022746	0.0176928		0.417597	0.68307		0.339499	0.916913		0.261151	0.756751		0.00736367	0.00734539		0.0581248	0.00612724		0.0658924	0.0405536
Am.leu	0.132857	0.0917958		0.133834	0.102164		0.154536	0.104098		0.0280063	0.149697		0	0.0917329		0.0817501	0.110305		0.315267	0.594406		0.483223	0.358181		0.282456	0.312149		0.0424335	0.126508		0.214835	0.101848		0.176853	0.150903
P.amb	0	0.461784		0.000900073	0.481102		0.0411219	0.520243		0.0128768	0.53185		0.00350585	0.462002		0.0610823	0.478031		0.00091617	0.189278		0.214943	0.319394		0.335966	0.570921		0.127558	0.626273		0.0378952	0.47826		0.0867119	0.526372
P.mol	0	0.00246099		0.00476485	0.0154916		0.0843622	0.0419058		0.0137943	0.086557		0	0.00255039		0.15079	0.0217325		0.0200033	0.411588		0.532281	0.799452					0.00149575	0.119052		0.0509068	0.0167409		0.141923	0.0596071
C.van	0.000899642	0.999315		0	0.998838		0	0.996775		0.597975	0.986143					0.664803	0.997863		0	0		0	0.0657286		0	0.00255039		0.00520406	0.973692		0.0844618	0.997869		0.335649	0.991931
C.atr	0.977514	0.999522					0.761157	0.998498		0.149113	0.98677		0	0.998838		0.171654	0.998099		0.0291315	0.00167832		0.0023935	0.0741909		0.00476485	0.0154916		0.0309748	0.978374		0.576518	0.998614		0.0393357	0.993722
P.phi	0.529042	0.998258		0.576518	0.998614		0.547299	0.996998		0.394963	0.989801		0.0844618	0.997869		0.471415	0.997499		0.0336716	0.0110388		0.0432443	0.0730562		0.0509068	0.0167409		0.170698	0.976597					0.462742	0.993218
D.ret	0	0		0.000626993	0.00510447		0.0182354	0		0.0164031	0.113418		0.00215591	0		0.0517301	0.0177147		0	0.150524		0.242866	0.205979		0.325226	0.406458		0.0657339	0.00277499		0.0410687	0.0387038		0.0608544	0.0164752
C.ova	0.663571	0.997459		0.761157	0.998498					0.14729	0.987696		0	0.996775		0.17155	0.996553		0.096525	0		0.0435565	0.077908		0.0843622	0.0419058		0.133259	0.986893		0.547299	0.996998		0.0663376	0.994363
D.aru	0	0		0	0.0110542		0.00924382	0.0141402		0.00634555	0.132264		0.00396073	0		0.0153035	0.020281		0	0.206749		0.167102	0.196431		0.227551	0.407625		0.0553207	0.0418114		0.0172658	0.0452509		0.0244898	0.0338643
P.sp1	0	0.895323		0	0.895847		0.0190137	0.896237		0.0063208	0.901614		0.000700182	0.901337		0.132947	0.900072		0	0.0381553		0.101731	0.168256		0.437076	0.121186		0.00727429	0.881797		0.0084437	0.89635		0.0506758	0.891393
P.ale	0	0.0653448		0.0023935	0.0741909		0.0435565	0.077908		0.00798974	0.106559		0	0.0657286		0.0587741	0.079097		0.547485	0.578217					0.532281	0.799452		0.00941813	0.103465		0.0432443	0.0730562		0.0737799	0.101836
N.ana	0	0.111761		0.0178335	0.114402		0.307761	0.112274		0.0103378	0.114179		0	0.111685		0.0114815	0.111693		0.00473512	0.372032		0.21812	0.738216		0.406711	0.388444		0	0.11125		0.0389238	0.112458		0.0669751	0.112947
Ch.cya	0	0.100692		0	0.101929		0.00240786	0.104741		0.0070619	0.130793		0	0.100623		0.185006	0.116849		0	0.205974		0.101936	0.226109		0.46686	0.312379		0	0.110838		0.00422641	0.10469		0.0654755	0.127297
Ch.rex	0.158743	0.998357		0.171654	0.998099		0.17155	0.996553		0.674236	0.991053		0.664803	0.997863					0.00267501	0.0370391		0.0587741	0.079097		0.15079	0.0217325		0.064961	0.977366		0.471415	0.997499		0.493319	0.995976
