# Supplementary material for: Broad-scale spatial distribution, microhabitat association and habitat partitioning of damselfishes (family Pomacentridae) on an Okinawan coral reef
Source: PeerJ. 2025 Feb 14;13:e18977. doi: 10.7717/peerj.18977 (PMC11831974; doi:10.7717/peerj.18977)
Supplement: Supplemental Information 22 [file peerj-13-18977-s022.xls]

## Sheet: Sheet1
Site name	Exposed or Inner	Abudefduf vaigiensis	Chromis atripes	Chromis vanderbilti	Chromis chrysura	Chromis margaritifer	Chromis ovatiformis	Chrysiptera rex	Neopomacentrus anabatoides	Pomacentrus lepidogenys	Pomacentrus philippinus	Pomacentrus vaiuli	Pomachromis richardsoni	Amblyglyphidodon leucogaster	Amblyglyphidodon curacao	Chromis tarnatensis	Chromis viridis	Chrysipitera cyanea	Dascyllus aruanus	Dascyllus reticulatus	Pomacentrus alexanderae	Pomacentrus amboinensis	Pomacentrus coelestis	Pomacentrus moluccensis	Pomacentrus sp.1	Chrysiptera parasema	Pomacentrus sp.2
KP1	Exposed reef	0	0	0	0	0	0	3.00752	0	54.1353	15.7895	7.5188	87.9699	19.5489	4.51128	1.50376	263.158	0	0	0	15.7895	0	0	8.27068	0	0	0
KP11	Exposed reef	0	0	0	0	4.31034	0	6.89655	0	140.517	57.7586	0	125.862	0	0	0	0	0	0	0	0	0	0	0	0	0	0
KP13	Exposed reef	0	0	0	0	0	0	13.5593	0	226.271	48.3051	1.69492	461.864	0.847458	0	0	0	0	0	0	0	0	0	0	0	0	0
KP14	Exposed reef	0	0	0	0	1.48148	0	27.4074	0	7.40741	0.740741	9.62963	91.8519	0	0	0	1.48148	15.5556	0	0	81.4815	3.7037	21.4815	38.5185	9.62963	0	0
KP15	Inner reef	0	0	0	0	0	0	0	0	0	0	0	0	0	2.95858	0	10.6509	2.36686	10.6509	0	8.28402	17.1598	0	3.5503	3.5503	1.18343	0
KP16	Inner reef	0	0	0	0	0	0	0	0	0	1.2987	0	0	0	9.09091	0	55.8442	0.649351	94.8052	0	15.5844	19.4805	0	1.2987	1.94805	8.44156	0
KP17	Inner reef	0	0	0	0	0	0	0.543478	0	0	0	0	10.8696	0	0	0	5.43478	7.06522	6.52174	0	0	13.587	0	0	0	0	0
KP18	Inner reef	0	0	0	0	0	0	0	0	0	0.662252	0	0	0	21.8543	0	221.192	2.64901	44.3709	0	6.62252	15.2318	0	5.29801	0.662252	24.5033	0
KP20	Inner reef	0	0	0	0	0	0	0	0	0	0	0	0	0	0	0	0	1.51134	0	0	0	5.03778	0	0	11.0831	0	0
KP21	Inner reef	0	0	0	0	0	0	0	0	0.540541	1.08108	0	1.08108	0	3.24324	0	13.5135	0.540541	6.48649	0	4.86486	18.3784	0	3.78378	0	3.24324	0
KP22	Inner reef	0	0	0	0	0	0	0	9.95025	0	0	0	0	0	0	0	98.5075	0	33.3333	2.48756	0.995025	19.9005	0	5.97015	0	0	0
KP26	Exposed reef	0	0	177.564	0	41.0256	0	17.3077	0	0	5.76923	0	369.231	0	0	0	0	0	0	0	0	0	0	0	0	0	0
KP27	Exposed reef	0	0	15.8621	0	11.7241	0	28.2759	0	3.44828	28.2759	2.75862	152.414	0	0	0	0	0	0	0	0	0	0	0	0	0	0
KP28	Exposed reef	0	0.543478	0	0.543478	3.80435	1.08696	1.08696	0	5.43478	3.80435	17.9348	1.08696	0	0	0	0	0	0	5.97826	0	0	0	0	0	0	0
KP29	Inner reef	0	0	0	0	0	0	0.588235	0	0	0	3.52941	32.3529	0.588235	1.17647	0	0	0	25.8824	10	0.588235	40.5882	0	0	0	0	0
KP30	Inner reef	0	0	0	0	0	0	0.595238	0	0	0	0	3.57143	0	0	0	0.595238	0	27.9762	7.14286	0	32.7381	3.57143	1.19048	0	0	0
KP31	Inner reef	0	0	0	0	0	1.96078	0	0	0	3.26797	0	0	0.653595	3.26797	0	0	0.653595	9.80392	0	28.7582	48.366	0	0	4.57516	0	0
KP32	Exposed reef	0	0	5.88235	8.82353	5.88235	0	2.35294	0	18.2353	0.588235	0	40	0	0	0	11.7647	0	23.5294	4.70588	0	25.8824	1.17647	0	0.588235	0	0
KP33	Inner reef	0	0	0	0	0	0	0	0	0	1.1976	0	0	0	0	0	1.79641	0	11.3772	2.99401	0.598802	49.7006	0	0.598802	0.598802	0	0
KP34	Inner reef	0	0	0	0	0	0	0	0	8.13953	0	0	11.6279	0	2.32558	0	52.3256	0	18.0233	3.48837	0	38.9535	2.90698	31.9767	1.16279	0	0
KP35	Inner reef	0	0	0	24.0223	1.67598	0	0	0	3.35196	4.46927	0.558659	6.14525	0	0.558659	0	0	0	0.558659	0	1.11732	16.2011	0.558659	0	0	0	0
KP36	Inner reef	0	0	0	3.16456	0	0.632911	0.632911	0	12.0253	0.632911	0	0	6.32911	1.26582	0	3.16456	0	18.3544	15.8228	19.6203	43.6709	0	0.632911	0	0	0
KP37	Inner reef	0	0	0	0	0	0	2.99401	0	2.39521	1.1976	0	10.7784	0	0	0	30.5389	0	10.1796	25.7485	0	69.4611	34.1317	2.99401	0	0	0
KP38	Exposed reef	0	0	0	0	2.05128	0	19.4872	0	57.9487	16.9231	6.15385	35.8974	1.02564	0	0	0	0	0	0	0	2.5641	0	3.58974	0	0	0
KP39	Exposed reef	0	0	5.55556	0	14.1975	0	14.1975	0	3.7037	14.8148	2.46914	14.8148	0	0	0	0	0	0	0	0	0	0	0	0	0	0
KP40	Exposed reef	12.1951	0	0	1.21951	33.5366	0	7.31707	0	9.14634	35.3659	3.04878	113.415	0	0	0	0	0	0	0	0	0	0	0	0	0	0
KP41	Exposed reef	0	0	15.942	0	8.69565	0	26.8116	0	0	6.52174	0	214.493	0	0	0	0	0	0	0	0	0	0	0	0	0	0
KP42	Inner reef	0	0	0	0	0	0	0.675676	0	4.05405	1.35135	0	0	1.35135	0	0	5.40541	0	25	20.9459	67.5676	79.7297	0	4.72973	0	0	0
KP43	Inner reef	0	0	0	0	0	0	0	0	0	0.584795	0	0	1.16959	4.09357	0	17.5439	0.584795	12.2807	0	8.18713	7.60234	0	5.84795	2.92398	17.5439	2.33918
KP44	Inner reef	0	0	0	0	0	0	0	0	0.649351	0	0	0	1.2987	1.2987	0	27.9221	0	7.14286	0	113.636	3.24675	0	1.2987	0	64.2857	4.54545
KP45	Inner reef	0	0	0	0	0	0	0	0	5.88235	0	3.36134	0.840336	5.88235	0	0	29.4118	0	12.605	0	246.218	12.605	0	36.1345	0	114.286	1.68067
KP5	Inner reef	0	0	0	0	0	0	0	0	0.540541	0	0.540541	0	0	0	0	0	11.8919	1.62162	0	0.540541	9.18919	0	21.6216	7.02703	0	0
KP50	Inner reef	0	0	0	0	0	0	0	0	0	0	0	0	9.72222	5.55556	0	0	0	0	0	52.7778	0.694444	0	6.94444	0	115.972	1.38889
KP51	Inner reef	0	0	0	0	1.37931	0	0	0	0	0	0	0	2.75862	6.89655	0	0	0	0	0	15.8621	8.96552	0	1.37931	2.06897	6.89655	2.06897
KP52	Inner reef	0	0	0	0	0	0	3.20513	0	15.3846	6.41026	10.2564	0	1.28205	0	0	0	0	3.84615	0.641026	10.8974	19.8718	0	0.641026	0	0	0
KP53	Inner reef	0	0	0	0	0	0	0	0	0	0	0	0	0	0	0	0	0	0	0	0	0	0	0.763359	0	286.26	5.34351
KP54	Inner reef	0	0	0	0	0	0	0	0	0	0	0	0	0.623053	13.7072	0	0.623053	0	14.3302	0	1.86916	3.11526	0	0	0	104.05	0.623053
KP55	Inner reef	0	0	0	0	0	0	20.2532	0	46.2025	0.632911	30.3797	3.16456	0	0	0	0	0	0	0	0	12.6582	0.632911	1.26582	0	0	0
KP56	Exposed reef	0	0	0	0	0	0	1.86335	0	2.48447	34.1615	7.45342	0	0	1.24224	0	0	0	0	0	0	0	0	0	0	0	0
KP57	Exposed reef	0	0	0	6.0241	13.8554	0	6.0241	0	5.42169	34.3373	5.42169	13.253	0	0	0	0	0	0	0	0	0	0	0	0	0	0
KP58	Exposed reef	0	0	40.678	0	106.78	0	28.8136	0	0	18.6441	0.847458	116.949	0	0	0	0	0	0	0	0	0	0	0	0	0	0
KP59	Exposed reef	0	0	166.393	0	48.3607	0	68.8525	0	0	9.83607	0	76.2295	0	0	0	0	0	0	0	0	0	2.45902	0	0	0	0
KP60	Exposed reef	99.0099	127.723	0	0	20.7921	16.8317	15.8416	0	58.4158	98.0198	3.9604	34.6535	3.9604	0	0	0	0	0	0	0	0	0	0	0	0	0
KP61	Exposed reef	8	8	0	15.3333	9.33333	0	11.3333	0	18	46	12	0	0	0	0	0	0	0	0	0	0	0	0	0	0	0
KP63	Exposed reef	1.1976	0	19.7605	0	52.6946	0	0	0	4.19162	8.98204	0	56.8862	0	0	0	0	0	0	0	0	0	0	0	0	0	0
KP64	Exposed reef	0	0	82.5806	0	56.129	0	25.1613	0	1.93548	0	0	49.0323	0	0	0	0	0	0	0	0	0	0	0	0	0	0
KP65	Exposed reef	0	0	20.6452	0	69.0323	0	23.2258	0	25.8065	8.3871	0	101.29	0	0	0	0	0	0	0	0	0	0	0	0	0	0
KP67	Inner reef	0	0	0	0	6.36364	0	3.63636	0	1.36364	1.36364	0.454545	25.9091	0	0	0	0	0.454545	0	0	0	7.27273	22.7273	0	0	0	0
KP68	Exposed reef	0	0	0	0	7.01754	0	8.77193	0	43.8596	20.1754	13.1579	640.351	0	0.877193	0	0	0	0	0	13.1579	11.4035	0	0.877193	0	0	0
KP69	Inner reef	0	0	0	0	0	0	0	0	0	0	0	0	1.1976	20.3593	0	0.598802	0	0	0	6.58683	1.79641	0	0.598802	1.79641	8.98204	26.3473
KP7	Exposed reef	0	0	0	0	5.12821	1.7094	7.69231	0	363.248	41.0256	5.12821	334.188	9.40171	0	0	0	0	0	0	0	0	0	2.5641	0	0	0
KP70	Inner reef	0	0	0	0	0	0	1.44928	0	0.724638	4.34783	0.724638	0	8.69565	17.3913	0	0	0	33.3333	0	108.696	16.6667	0	9.42029	0	36.2319	6.52174
KP73	Inner reef	0	0	0	0	0	0	0.42735	0	8.11966	0	2.13675	0.42735	0.42735	2.13675	0	17.094	0	0	0	3.84615	14.1026	0	21.3675	5.55556	0.42735	0
KP9	Exposed reef	0	0	0	0	11.6667	0	21.6667	0	205	38.3333	4.16667	370.833	0	0	0	0	0	0	0	0	0	0	0.833333	0	0	0
P1	Exposed reef	0	11.4504	0	0	32.8244	1.52672	15.2672	0	37.4046	98.4733	2.29008	61.8321	0	0	0	0	0	0	0	0	0	0	0	0	0	0
P10	Exposed reef	0	0	0	0	0	0	5.44218	0	31.2925	2.72109	6.80272	86.3946	2.04082	1.36054	0	0	0	0	0	86.3946	4.08163	0	11.5646	1.36054	0	0
P11	Exposed reef	0	2.47934	0	0	1.65289	8.26446	0.826446	275.207	28.9256	8.26446	3.30579	28.9256	2.47934	0	0	0	0	0	0	71.0744	4.13223	0	22.314	0	0	0
P12	Exposed reef	0	0	0	0.662252	0	0	0	0	24.5033	9.93377	3.31126	0	0.662252	0.662252	0	0	0	0	0	119.205	5.29801	0	4.63576	0	0	0
P13	Inner reef	0	0	0	0	0	0	0	7.0922	0	0	0	0	3.5461	14.8936	0	0	0	0.70922	0.70922	202.837	6.38298	0	1.41844	0	26.2411	1.41844
P2	Exposed reef	0	12.7389	0	1.27389	12.7389	12.7389	12.1019	0	54.1401	46.4968	2.54777	19.1083	0	0	0	0	0	0	0	0.636943	0	0	0	0	0	0
P3	Exposed reef	0	14.1243	0	0	5.64972	9.03955	0.564972	0	62.7119	16.9492	14.6893	9.60452	0	0	8.47458	0	0	0	0	0.564972	0.564972	0	0	0	0	0
P4	Exposed reef	0	0.60423	0	22.3565	0	4.83384	0.60423	0	5.43807	6.64653	10.8761	0	1.20846	0	0	0	0	0	1.20846	2.41692	1.81269	0	0	0	0	0
P5	Inner reef	0	0	0	0	0	0	0	1.44928	0	1.44928	0	0	8.69565	10.8696	30.4348	163.768	0	0	0	353.623	0	0	1.44928	0	20.2899	10.1449
P6	Inner reef	0	0	0	0	0	0	0	0.719424	0	0	0	0	4.31655	16.5468	0	21.5827	0	0	0	192.086	0.719424	0	11.5108	0	30.2158	2.15827
P7	Inner reef	0	0	0	0	0	0	0	0	0	0	0	0	0.606061	10.9091	0	0	0	0	0	118.788	0	0	0	0	16.3636	4.84848
P8	Inner reef	0	0	0	0	0.694444	0	1.38889	104.167	4.86111	0	1.38889	130.556	0	0	0	34.7222	0	9.72222	18.0556	176.389	25	0.694444	43.0556	0	0.694444	0
P9	Inner reef	0	0	0	0	3.4965	0	5.59441	0	55.2448	13.2867	9.79021	1.3986	0.699301	0	0	0.699301	0	0	21.6783	106.993	3.4965	0	14.6853	0	0	0
