# Supplementary material for: Broad-scale spatial distribution, microhabitat association and habitat partitioning of damselfishes (family Pomacentridae) on an Okinawan coral reef
Source: PeerJ. 2025 Feb 14;13:e18977. doi: 10.7717/peerj.18977 (PMC11831974; doi:10.7717/peerj.18977)
Supplement: Supplemental Information 23 [file peerj-13-18977-s023.xls]

## Sheet: Sheet1
	Pomacentrus sp.1			Pomacentrus vaiuli			Chromis margaritifer			Chromis chrysura			Pomachromis richardsoni			Pomacentrus coelestis			Chrysiptera rex			Pomacentrus philippinus			Abudefduf vaigiensis			Chromis vanderbilti			Chromis atripes			Chromis ovatiformis
Substrate	W^	95CI		W^	95CI		W^	95CI		W^	95CI		W^	95CI		W^	95CI		W^	95CI		W^	95CI		W^	95CI		W^	95CI		W^	95CI		W^	95CI
Staghorn Acropora	0	0		0.169696	0.53432		0.167601	0.263873		0	0		0.213071	0.473958		0	0		0	0		0.0427291	0.134903		0	0		0	0		0.158383	0.498818		0	0
Branching Acropora	0	0		1.48203	1.60776		1.69244	0.850052		0	0		2.09345	1.49499		0	0		0.934612	1.02519		0.279879	0.359109		0	0		0	0		0	0		0	0
Bottlebrush Acropora	1.88593	4.11931		0.909286	1.64105		0	0		0	0		0	0		0	0		0.191141	0.602644		0	0		0	0		0	0		0	0		0	0
Corymbose Acropora	1.77731	3.88207		1.14256	1.77927		2.60955	1.31068		0	0		0	0		3.07612	9.33918		0.540399	0.979234		0.143847	0.320842		0	0		0	0		0	0		0	0
Tabular Acropora	0	0		0.512274	1.61299		1.51785	1.36987		0	0		0	0		0	0		0.323055	1.01855		0	0		0	0		0	0		0	0		0	0
Pocillopora	0	0		0.596253	1.87742		3.2389	2.13934		0	0		0	0		0	0		0	0		4.05366	2.4046		0	0		0	0		0.556503	1.75268		0	0
Branching Isopora	0.759433	2.37299		0	0		0	0		0	0		0	0		0	0		0	0		0	0		0	0		0	0		0	0		0	0
Branching Millepora	0.710181	2.2191		2.05445	2.09331		1.52182	0.903177		5.32636	5.43228		1.57641	1.46445		0	0		0.287911	0.640421		0.517308	0.54047		0	0		0	0		0.639163	1.15439		2.13054	6.50423
Branching Porites	1.54655	3.37802		0.497104	1.10279		0.0613708	0.193761		0	0		0	0		0	0		0	0		0	0		0	0		0	0		0	0		0	0
Branching corals	0	0		0	0		0	0		0	0		4.28139	7.75836		0	0		0	0		0	0		0	0		0	0		4.24333	9.41813		0	0
Foliose corals	0	0		0	0		0	0		0	0		0	0		0	0		0	0		0.323233	0.720951		0	0		0	0		1.19812	2.65924		0	0
Massive corals	2.0419	3.07949		0.492245	0.888391		0.648224	0.50482		0	0		0	0		0	0		0.103475	0.326243		0.165262	0.260173		0	0		0.820408	1.80013		0	0		0	0
Other corals	0	0		0.093983	0.295924		0.232057	0.229836		0.822351	1.45268		0	0		0	0		0.355611	0.45252		0.0236648	0.0747135		0	0		0	0		0	0		0	0
Dead Staghorn Acropora	0	0		0.845847	1.52656		0.208851	0.380024		0	0		1.06205	1.35156		0	0		0.355611	0.791011		0.0709944	0.22414		0	0		0	0		0	0		0	0
Dead Branching Acropora	2.65208	5.79278		0.426228	1.34206		0.210483	0.469485		0	0		0	0		0	0		0.268792	0.847468		0	0		0	0		0	0		0	0		0	0
Dead Bottlebrush Acropora	0	0		0	0		0	0		0	0		0	0		0	0		0	0		0	0		0	0		0	0		0	0		0	0
Dead Corymbose Acropora	0	0		0.713165	2.24554		0.35218	0.785543		0	0		0	0		7.68024	23.3174		0	0		0	0		0	0		0	0		0	0		0	0
Dead Tabular Acropora	7.89457	11.9062		0	0		0	0		0	0		0	0		0	0		0.400063	1.26135		0	0		0	0		0	0		0	0		0	0
Dead Pocillopora	0	0		0	0		0	0		0	0		0	0		0	0		0	0		0	0		0	0		0	0		0	0		0	0
Dead Branching Isopora	0	0		2.05876	6.48241		0	0		0	0		0	0		0	0		0	0		0	0		0	0		0	0		0	0		0	0
Dead Branching Millepora	0	0		2.42476	7.63483		0	0		0	0		0	0		0	0		0	0		0	0		0	0		0	0		0	0		0	0
Dead Branching Porites	0	0		0	0		0	0		0	0		0	0		0	0		0	0		0	0		0	0		0	0		0	0		0	0
Dead Branching corals	0	0		0	0		0	0		0	0		0.752772	2.37342		0	0		0	0		0	0		0	0		0	0		0	0		0	0
Dead Foliose corals	0	0		0	0		0	0		0	0		0	0		0	0		0	0		0	0		0	0		0	0		0	0		0	0
Dead Massive corals	0	0		0	0		0	0		0	0		0	0		0	0		0	0		0	0		0	0		0	0		0	0		0	0
Dead Other corals	0	0		0	0		0	0		0	0		0	0		0	0		0	0		0	0		0	0		0	0		0	0		0	0
Soft corals	0	0		0	0		1.53953	1.97556		0	0		0	0		0	0		0.655341	2.06621		0.52333	1.16725		0	0		0	0		0	0		0	0
Rock	1.33727	0.704297		2.08471	0.370696		2.05898	0.185591		2.31933	0.5768		2.45566	0.246638		2.54596	0.95145		2.62937	0.211856		2.71122	0.120386		3.00886	0		2.9014	0.235787		2.82833	0.184367		2.80827	0.612374
Coral rubble	1.23378	1.35414		0.16996	0.306739		0	0		0	0		0	0		0	0		0.0357273	0.112644		0	0		0	0		0	0		0	0		0	0
Sand	0	0		0	0		0	0		0	0		0	0		0	0		0	0		0	0		0	0		0	0		0	0		0	0
Macroalgae	0	0		0	0		0	0		0	0		0	0		0	0		0	0		0	0		0	0		0	0		0	0		0	0
