# Supplementary material for: Broad-scale spatial distribution, microhabitat association and habitat partitioning of damselfishes (family Pomacentridae) on an Okinawan coral reef
Source: PeerJ. 2025 Feb 14;13:e18977. doi: 10.7717/peerj.18977 (PMC11831974; doi:10.7717/peerj.18977)
Supplement: Supplemental Information 24 [file peerj-13-18977-s024.xls]

## Sheet: Sheet1
	Pomacentrus sp.2			Chrysipitera cyanea			Dascyllus reticulatus			Dascyllus aruanus			Chromis tarnatensis			Pomacentrus lepidogenys			Chrysiptera parasema
Substrate	W^	95CI		W^	95CI		W^	95CI		W^	95CI		W^	95CI		W^	95CI		W^	95CI
Staghorn Acropora	0	0		0	0		1.0606	1.46499		0.642092	1.41521		3.29964	4.32711		0.993183	0.327493		1.88811	0.533807
Branching Acropora	0	0		3.55687	2.13117		1.85253	1.99442		2.45336	2.78818		12.9677	6.82968		8.45213	0.837253		10.0014	1.04869
Bottlebrush Acropora	3.03095	4.12752		1.69733	1.98628		0	0		0	0		0	0		0.725701	0.37892		5.65973	1.19845
Corymbose Acropora	0	0		1.14256	1.59142		13.5679	5.65346		12.4292	6.79884		0	0		1.50079	0.523466		2.10035	0.741065
Tabular Acropora	0	0		0	0		0	0		0	0		0	0		0.74955	0.502337		0	0
Pocillopora	0	0		0	0		26.8314	11.6406		27.0731	14.3545		0	0		0.674148	0.514585		0.0576886	0.182233
Branching Isopora	0	0		6.63962	3.22984		6.10259	3.90815		1.84727	2.83871		0	0		0.162349	0.161846		2.57431	0.749252
Branching Millepora	0	0		1.09571	1.38909		0	0		3.02307	3.43564		0	0		4.55461	0.769467		3.20244	0.797178
Branching Porites	0	0		0	0		0	0		0.940467	2.07284		8.69932	7.93563		0.0661231	0.104375		1.7074	0.624407
Branching corals	0	0		0	0		0	0		17.2027	26.4355		0	0		2.11663	1.78163		0	0
Foliose corals	0	0		0	0		0	0		0	0		0	0		0.896454	0.615075		2.2356	1.16268
Massive corals	0	0		0	0		0	0		0	0		0	0		0.862111	0.300698		0	0
Other corals	0	0		0	0		0.234958	0.520294		0	0		0	0		0.0312533	0.0441145		0.882024	0.273347
Dead Staghorn Acropora	14.0975	7.14356		0	0		1.05731	1.90297		0	0		4.38587	6.53337		1.70643	0.552915		0.109116	0.172166
Dead Branching Acropora	0	0		0	0		0	0		0	0		0	0		2.35286	0.799849		0.907243	0.606559
Dead Bottlebrush Acropora	4.64316	7.12351		0	0		0	0		0	0		0	0		0	0		0.336926	0.433754
Dead Corymbose Acropora	0	0		0	0		0	0		0	0		0	0		0.426883	0.448688		0.207	0.377265
Dead Tabular Acropora	0	0		0	0		0	0		0	0		0	0		0	0		0	0
Dead Pocillopora	0	0		0	0		0	0		0	0		0	0		0	0		0	0
Dead Branching Isopora	0	0		0	0		0	0		0	0		0	0		0.821548	1.05834		0.398378	0.889543
Dead Branching Millepora	0	0		0	0		0	0		0	0		0	0		3.22534	2.26816		1.6422	1.95664
Dead Branching Porites	0	0		0	0		0	0		0	0		0	0		0.2419	0.311622		0	0
Dead Branching corals	0	0		0	0		0	0		0	0		0	0		0	0		0	0
Dead Foliose corals	0	0		0	0		0	0		0	0		0	0		0	0		0	0
Dead Massive corals	0	0		0	0		0	0		0	0		0	0		0	0		0	0
Dead Other corals	0	0		0	0		0	0		0	0		0	0		0	0		0	0
Soft corals	0	0		0	0		0	0		0	0		0	0		1.31317	0.947683		0	0
Rock	0.386854	0.38039		0.171935	0.16683		0	0		0	0		0	0		0.728988	0.0887926		0	0
Coral rubble	3.05928	1.45817		4.03372	0.947169		0	0		0	0		0	0		0	0		0	0
Sand	0	0		0	0		0	0		0	0		0	0		0	0		0	0
Macroalgae	0	0		0	0		0	0		0	0		0	0		0	0		0	0
