# Supplementary material for: Broad-scale spatial distribution, microhabitat association and habitat partitioning of damselfishes (family Pomacentridae) on an Okinawan coral reef
Source: PeerJ. 2025 Feb 14;13:e18977. doi: 10.7717/peerj.18977 (PMC11831974; doi:10.7717/peerj.18977)
Supplement: Supplemental Information 25 [file peerj-13-18977-s025.xls]

## Sheet: Sheet1
	Chromis viridis			Pomacentrus moluccensis			Pomacentrus alexanderae			Amblyglyphidodon curacao			Amblyglyphidodon leucogaster			Pomacentrus amboinensis			Neopomacentrus anabatoides
Substrate	W^	95CI		W^	95CI		W^	95CI		W^	95CI		W^	95CI		W^	95CI		W^	95CI
Staghorn Acropora	0.168492	0.113112		0.649518	0.396984		1.30603	0.309534		7.30997	2.48128		11.8277	2.45909		0.791913	1.10032		1.69696	1.55801
Branching Acropora	5.71049	0.609743		2.61809	0.800625		2.55451	0.441769		0.399007	0.722338		5.78818	2.23557		1.90194	1.74441		0	0
Bottlebrush Acropora	0	0		0.937014	0.638961		1.3191	0.420964		0.870427	1.3611		1.45694	1.59955		2.26311	2.46006		0	0
Corymbose Acropora	1.84349	0.475785		3.91065	1.21716		0.274797	0.188839		0	0		0	0		0.533194	1.18343		0	0
Tabular Acropora	0	0		0	0		0	0		0	0		0	0		0	0		0	0
Pocillopora	0.403653	0.328547		0.175553	0.391853		0	0		0	0		0.358264	1.12968		0	0		0	0
Branching Isopora	8.06439	0.823296		8.80416	1.53145		5.61374	0.723805		1.57728	1.62261		0.440015	0.79759		0.22783	0.717539		0	0
Branching Millepora	0.628449	0.251756		7.56108	1.39174		2.25882	0.468193		4.75275	2.57318		3.15467	1.97337		12.3572	4.0155		0.207521	0.653632
Branching Porites	15.9964	0.983935		6.80577	1.41432		10.7147	0.918231		14.0974	3.86565		1.94148	1.65341		1.39189	1.75935		16.2689	4.42104
Branching corals	0	0		0.334648	1.05693		0.416558	0.65773		0	0		0	0		12.73	16.0907		0	0
Foliose corals	0.28968	0.289005		1.98426	1.35309		10.1444	1.62552		0	0		1.15698	2.09719		0	0		5.83499	5.6383
Massive corals	0	0		0.024155	0.0762897		0.105236	0.0886724		0	0		0	0		0.153143	0.482316		0	0
Other corals	0	0		0	0		0.142082	0.0777339		0	0		0	0		0	0		0	0
Dead Staghorn Acropora	0	0		0	0		0.116249	0.122268		0.40485	0.899969		0.338823	0.753829		0	0		0	0
Dead Branching Acropora	0	0		0.188239	0.342887		0.35147	0.26101		0	0		0	0		0	0		0	0
Dead Bottlebrush Acropora	0	0		0.085442	0.269855		0.850841	0.472797		0	0		0	0		1.0834	2.40463		0	0
Dead Corymbose Acropora	0	0		1.99476	1.43159		1.66623	0.73111		1.53605	2.78077		0	0		2.66248	4.15026		0	0
Dead Tabular Acropora	0	0		0	0		0.290622	0.289937		0	0		0	0		0	0		0	0
Dead Pocillopora	0	0		0	0		0	0		0	0		0	0		0	0		0	0
Dead Branching Isopora	0	0		2.42462	2.69743		5.94184	2.34107		0	0		0	0		1.92151	6.0517		0	0
Dead Branching Millepora	0	0		0.356958	1.12739		0.666492	0.858973		0	0		0	0		0	0		0	0
Dead Branching Porites	0.273587	0.272949		0	0		3.22138	0.927037		0	0		0	0		1.13156	2.5115		27.5541	10.1192
Dead Branching corals	0	0		0.176517	0.557502		0	0		0	0		0	0		0	0		0	0
Dead Foliose corals	0	0		0	0		0	0		0	0		0	0		0	0		0	0
Dead Massive corals	0	0		0	0		0	0		0	0		0	0		4.24333	13.3642		0	0
Dead Other corals	0	0		0	0		0	0		0	0		0	0		0	0		0	0
Soft corals	0	0		0	0		0	0		0	0		0	0		0	0		0	0
Rock	0	0		0.00316389	0.00999265		0.0777815	0.0272937		0.0925804	0.117583		0.154963	0.137671		0.641891	0.31803		0.195381	0.188795
Coral rubble	0	0		0	0		0	0		0	0		0	0		0.528764	0.510467		0	0
Sand	0	0		0	0		0	0		0	0		0	0		0	0		0	0
Macroalgae	0	0		0	0		0	0		0	0		0	0		0	0		0	0
						Pomacentrus coelestis		Pomacentrus sp.1	Chrysiptera parasema	Pomacentrus sp.2
