# Supplementary material for: Broad-scale spatial distribution, microhabitat association and habitat partitioning of damselfishes (family Pomacentridae) on an Okinawan coral reef
Source: PeerJ. 2025 Feb 14;13:e18977. doi: 10.7717/peerj.18977 (PMC11831974; doi:10.7717/peerj.18977)
Supplement: Supplemental Information 26 [file peerj-13-18977-s026.xls]

## Sheet: Sheet1
Species	Total number of individuals	Over 50 individuals?	Analyses
Pomachromis richardsoni	5233	Yes	X
Pomacentrus alexanderae	3199	Yes	X
Pomacentrus lepidogenys	2199	Yes	X
Chromis viridis	1658	Yes	X
Chrysiptera parasema	1243	Yes	X
Pomacentrus amboinensis	1207	Yes	X
Pomacentrus philippinus	1126	Yes	X
Chromis margaritifer	852	Yes	X
Chromis vanderbilti	785	Yes	X
Dascyllus aruanus	742	Yes	X
Chrysiptera rex	651	Yes	X
Neopomacentrus anabatoides	516	Yes	X
Pomacentrus moluccensis	510	Yes	X
Pomacentrus vaiuli	322	Yes	X
Amblyglyphidodon curacao	273	Yes	X
Dascyllus reticulatus	224	Yes	X
Chromis atripes	206	Yes	X
Pomacentrus coelestis	155	Yes	X
Chromis chrysura	139	Yes	X
Amblyglyphidodon leucogaster	139	Yes	X
Abudefduf vaigiensis	134	Yes	X
Pomacentrus sp.2	106	Yes	X
Pomacentrus sp.1	95	Yes	X
Chromis ovatiformis	81	Yes	X
Chrysipitera cyanea	72	Yes	X
Chromis tarnatensis	59	Yes	X
Stegastes spp.	53	Yes	Genus Stegastes was not included in analyses, becayse species-level identification was difficult due to similar body coloration among species
Plectroglyphidodon lacrymatus	48	No
Chromis yamakawai	45	No
Chromis weberi	45	No
Neopomacentrus cyanomos	44	No
Dascyllus trimaculatus	39	No
Neoglyphidodon nigroris	26	No
Plectroglyphidodon dickii	21	No
Pomacentrus nagasakiensis	21	No
Chromis xanthura	20	No
Dischistodus prosopotaenia	19	No
Pomacentrus bankanensis	14	No
Abudefduf sexfasciatus	12	No
Pomacentrus chrysurus	10	No
Amblyglyphidodon tarnetensis	8	No
Pomacentrus sp. 3	5	No
Chromis lepidolepis	4	No
Plectroglyphidodon johnstonianus	4	No
Pomacentrus nigromarginatus	3	No
Pomacentrus pavo	2	No
Neoglyphidodon melas	2	No
Chrysiptera starcki	1	No
