# Supplementary material for: Broad-scale spatial distribution, microhabitat association and habitat partitioning of damselfishes (family Pomacentridae) on an Okinawan coral reef
Source: PeerJ. 2025 Feb 14;13:e18977. doi: 10.7717/peerj.18977 (PMC11831974; doi:10.7717/peerj.18977)
Supplement: Supplemental Information 27 [file peerj-13-18977-s027.xls]

## Sheet: Sheet1
Variables	PC axis 1	PC axis 2	PC axis 3
Staghorn Acropora	0.007	-0.018	0.032
Branching Acropora	0.015	-0.053	0.104
Bottlebrush Acropora	0.027	-0.086	0.123
Corymbose Acropora	-0.005	-0.011	0.004
Tabular Acropora	-0.002	-0.01	0.045
Pocillopora	-0.011	-0.003	-0.002
Branching Isopora	0.004	-0.017	0.002
Branching Millepora	0.016	-0.068	0.078
Branching Porites	0.007	-0.006	-0.001
Branching corals	0.005	-0.011	0.008
Foliose corals	0	-0.01	0.007
Massive corals	-0.022	-0.035	0.065
Other corals	-0.039	-0.063	0.195
Dead Staghorn Acropora	0.003	-0.009	0.016
Dead Branching Acropora	0.078	-0.138	0.111
Dead Bottlebrush Acropora	0.024	-0.045	0.091
Dead Corymbose Acropora	-0.003	0.003	-0.003
Dead Tabular Acropora	-0.003	-0.004	0.005
Dead Pocillopora	-0.002	0	0
Dead Branching Isopora	0	-0.002	-0.002
Dead Branching Millepora	0.001	0.001	-0.001
Dead Branching Porites	0.004	0.001	0.012
Dead Branching corals	0	-0.01	0.006
Dead Foliose corals	0	0	0
Dead Massive corals	0	-0.007	0.004
Dead Other corals	0.036	-0.107	-0.017
Soft corals	-0.027	0.002	0.019
Rock	-0.868	0.227	-0.304
Coral rubble	0.306	-0.336	-0.812
Sand	0.365	0.88	-0.14
Macroalgae	0.084	-0.067	0.356
Depth	-0.028	-0.051	0.047
