# Supplementary material for: Broad-scale spatial distribution, microhabitat association and habitat partitioning of damselfishes (family Pomacentridae) on an Okinawan coral reef
Source: PeerJ. 2025 Feb 14;13:e18977. doi: 10.7717/peerj.18977 (PMC11831974; doi:10.7717/peerj.18977)
Supplement: Supplemental Information 28 [file peerj-13-18977-s028.xls]

## Sheet: Sheet1
Substrate	(A) P.sp1	(B) P.vaiuli	(C) C.margaritifer	(D) C.chrysura	(E) P.richardsoni	(F) P.coelestis	Proportion of substrates
Staghorn Acropora	0	1	4	0	2	0	0.0420922
Branching Acropora	0	8	37	0	18	0	0.0385572
Bottlebrush Acropora	2	3	0	0	0	0	0.0235664
Corymbose Acropora	2	4	37	0	0	1	0.0250065
Tabular Acropora	0	1	12	0	0	0	0.0139434
Pocillopora	0	1	22	0	0	0	0.0119796
Branching Isopora	1	0	0	0	0	0	0.0292616
Branching Millepora	1	9	27	8	11	0	0.0312909
Branching Porites	2	2	1	0	0	0	0.0287379
Branching corals	0	0	0	0	3	0	0.00314218
Foliose corals	0	0	0	0	0	0	0.0111286
Massive corals	4	3	16	0	0	0	0.0435323
Other corals	0	1	10	3	0	0	0.0760016
Dead Staghorn Acropora	0	3	3	0	6	0	0.0253339
Dead Branching Acropora	2	1	2	0	0	0	0.0167583
Dead Bottlebrush Acropora	0	0	0	0	0	0	0.0123069
Dead Corymbose Acropora	0	1	2	0	0	1	0.0100157
Dead Tabular Acropora	4	0	0	0	0	0	0.0112595
Dead Pocillopora	0	0	0	0	0	0	0.00229118
Dead Branching Isopora	0	1	0	0	0	0	0.00346949
Dead Branching Millepora	0	1	0	0	0	0	0.0029458
Dead Branching Porites	0	0	0	0	0	0	0.0117832
Dead Branching corals	0	0	0	0	1	0	0.00595706
Dead Foliose corals	0	0	0	0	0	0	0.000196386
Dead Massive corals	0	0	0	0	0	0	0.00157109
Dead Other corals	0	0	0	0	0	0	0.0102776
Soft corals	0	0	6	0	0	0	0.00687353
Rock	20	97	388	37	182	11	0.332351
Coral rubble	7	3	0	0	0	0	0.12608
Sand	0	0	0	0	0	0	0.0190495
Macroalgae	0	0	0	0	0	0	0.0232391
