# Supplementary material for: Broad-scale spatial distribution, microhabitat association and habitat partitioning of damselfishes (family Pomacentridae) on an Okinawan coral reef
Source: PeerJ. 2025 Feb 14;13:e18977. doi: 10.7717/peerj.18977 (PMC11831974; doi:10.7717/peerj.18977)
Supplement: Supplemental Information 31 [file peerj-13-18977-s031.xls]

## Sheet: Sheet1
Substrate	(A) C.viridis	(B) P.moluccensis	(C) P.alexanderae	(D) A.curacao	(E) A.laucogaster	(F) P. amboinensis	(G) N.anabatoides	Proportion of substrates
Staghorn Acropora	22	26	168	60	116	5	11	0.0420922
Branching Acropora	683	96	301	3	52	11	0	0.0385572
Bottlebrush Acropora	0	21	95	4	8	8	0	0.0235664
Corymbose Acropora	143	93	21	0	0	2	0	0.0250065
Tabular Acropora	0	0	0	0	0	0	0	0.0139434
Pocillopora	15	2	0	0	1	0	0	0.0119796
Branching Isopora	732	245	502	9	3	1	0	0.0292616
Branching Millepora	61	225	216	29	23	58	1	0.0312909
Branching Porites	1426	186	941	79	13	6	72	0.0287379
Branching corals	0	1	4	0	0	6	0	0.00314218
Foliose corals	10	21	345	0	3	0	10	0.0111286
Massive corals	0	1	14	0	0	1	0	0.0435323
Other corals	0	0	33	0	0	0	0	0.0760016
Dead Staghorn Acropora	0	0	9	2	2	0	0	0.0253339
Dead Branching Acropora	0	3	18	0	0	0	0	0.0167583
Dead Bottlebrush Acropora	0	1	32	0	0	2	0	0.0123069
Dead Corymbose Acropora	0	19	51	3	0	4	0	0.0100157
Dead Tabular Acropora	0	0	10	0	0	0	0	0.0112595
Dead Pocillopora	0	0	32	0	0	0	0	0.00229118
Dead Branching Isopora	0	8	63	0	0	1	0	0.00346949
Dead Branching Millepora	0	1	6	0	0	0	0	0.0029458
Dead Branching Porites	10	0	116	0	0	2	50	0.0117832
Dead Branching corals	0	1	0	0	0	0	0	0.00595706
Dead Foliose corals	0	0	0	0	0	0	0	0.000196386
Dead Massive corals	0	0	0	0	0	1	0	0.00157109
Dead Other corals	0	0	0	0	0	0	0	0.0102776
Soft corals	0	0	0	0	0	0	0	0.00687353
Rock	0	1	79	6	12	32	10	0.332351
Coral rubble	0	0	0	0	0	10	0	0.12608
Sand	0	0	0	0	0	0	0	0.0190495
Macroalgae	0	0	0	0	0	0	0	0.0232391
